# Supplementary material for: The National Cohort of Esophageal Cancer-Prospective Cohort Study of Esophageal Cancer and Precancerous Lesions based on High-Risk Population in China (NCEC-HRP): study protocol
Source: PubMed Central journal article supplement — BMJ Open. 2019 Apr 3;9(4):e027360. doi: 10.1136/bmjopen-2018-027360 (PMC6500261; doi:10.1136/bmjopen-2018-027360), 2019-04-03
Supplement: bmjopen-2018-027360.draft_revisions.pdf [file bmjopen-2018-027360.draft_revisions.pdf]

# BMJ Open

BMJ Open is committed to open peer review. As part of this commitment we make the peer review history of every article we publish publicly available.

When an article is published we post the peer reviewers' comments and the authors' responses online. We also post the versions of the paper that were used during peer review. These are the versions that the peer review comments apply to.

The versions of the paper that follow are the versions that were submitted during the peer review process. They are not the versions of record or the final published versions. They should not be cited or distributed as the published version of this manuscript.

BMJ Open is an open access journal and the full, final, typeset and author-corrected version of record of the manuscript is available on our site with no access controls, subscription charges or pay-per-view fees (<http://bmjopen.bmj.com>).

If you have any questions on BMJ Open's open peer review process please email [info.bmjopen@bmj.com](mailto:info.bmjopen@bmj.com)

# BMJ Open

## The National Cohort of Esophageal Cancer-Prospective Cohort Study of Esophageal Cancer and Precancerous Lesions based on High Risk Population in China(NCEC-HRP): rationale and design

|                               |                                                                                                                                                                                                                                                                                                                                                                                                                                                                                                                                                                                                                                                                                                                                                                                                                                                                                                                                                                                                                                                                                                                                                                                                                                                                                                                                                                                                                                                                                                                                                                                                                                                                        |
|-------------------------------|------------------------------------------------------------------------------------------------------------------------------------------------------------------------------------------------------------------------------------------------------------------------------------------------------------------------------------------------------------------------------------------------------------------------------------------------------------------------------------------------------------------------------------------------------------------------------------------------------------------------------------------------------------------------------------------------------------------------------------------------------------------------------------------------------------------------------------------------------------------------------------------------------------------------------------------------------------------------------------------------------------------------------------------------------------------------------------------------------------------------------------------------------------------------------------------------------------------------------------------------------------------------------------------------------------------------------------------------------------------------------------------------------------------------------------------------------------------------------------------------------------------------------------------------------------------------------------------------------------------------------------------------------------------------|
| Journal:                      | <i>BMJ Open</i>                                                                                                                                                                                                                                                                                                                                                                                                                                                                                                                                                                                                                                                                                                                                                                                                                                                                                                                                                                                                                                                                                                                                                                                                                                                                                                                                                                                                                                                                                                                                                                                                                                                        |
| Manuscript ID                 | bmjopen-2018-027360                                                                                                                                                                                                                                                                                                                                                                                                                                                                                                                                                                                                                                                                                                                                                                                                                                                                                                                                                                                                                                                                                                                                                                                                                                                                                                                                                                                                                                                                                                                                                                                                                                                    |
| Article Type:                 | Protocol                                                                                                                                                                                                                                                                                                                                                                                                                                                                                                                                                                                                                                                                                                                                                                                                                                                                                                                                                                                                                                                                                                                                                                                                                                                                                                                                                                                                                                                                                                                                                                                                                                                               |
| Date Submitted by the Author: | 18-Oct-2018                                                                                                                                                                                                                                                                                                                                                                                                                                                                                                                                                                                                                                                                                                                                                                                                                                                                                                                                                                                                                                                                                                                                                                                                                                                                                                                                                                                                                                                                                                                                                                                                                                                            |
| Complete List of Authors:     | Chen, Ru; National Cancer Center/National Clinical Research Center for Cancer/Cancer Hospital, Chinese Academy of Medical Sciences and Peking Union Medical College,<br>Ma, Shanrui; National Cancer Center/National Clinical Research Center for Cancer/Cancer Hospital, Chinese Academy of Medical Sciences and Peking Union Medical College<br>Guan, Chentao; National Cancer Center/National Clinical Research Center for Cancer/Cancer Hospital, Chinese Academy of Medical Sciences and Peking Union Medical College<br>Song, Guohui; Cixian Cancer Institute in Handan, Cixian cancer registry<br>Ma, Qing; National Cancer Center/National Clinical Research Center for Cancer/Cancer Hospital, Chinese Academy of Medical Sciences and Peking Union Medical College<br>Xie, Shuanghua; National Cancer Center/National Clinical Research Center for Cancer/Cancer Hospital, Chinese Academy of Medical Sciences and Peking Union Medical College<br>Wang, Meng; National Cancer Center/National Clinical Research Center for Cancer/Cancer Hospital, Chinese Academy of Medical Sciences and Peking Union Medical College<br>Shao, Dantong; National Cancer Center/National Clinical Research Center for Cancer/Cancer Hospital, Chinese Academy of Medical Sciences and Peking Union Medical College<br>Li, Xinqing; National Cancer Center/National Clinical Research Center for Cancer/Cancer Hospital, Chinese Academy of Medical Sciences and Peking Union Medical College<br>Wei, Wen-Qiang; National Cancer Center/National Clinical Research Center for Cancer/Cancer Hospital, Chinese Academy of Medical Sciences and Peking Union Medical College, |
| Keywords:                     | Epidemiology < ONCOLOGY, EPIDEMIOLOGY, Gastrointestinal tumours < GASTROENTEROLOGY                                                                                                                                                                                                                                                                                                                                                                                                                                                                                                                                                                                                                                                                                                                                                                                                                                                                                                                                                                                                                                                                                                                                                                                                                                                                                                                                                                                                                                                                                                                                                                                     |
|                               |                                                                                                                                                                                                                                                                                                                                                                                                                                                                                                                                                                                                                                                                                                                                                                                                                                                                                                                                                                                                                                                                                                                                                                                                                                                                                                                                                                                                                                                                                                                                                                                                                                                                        |

1  
2  
3  
4  
5  
6  
7  
8  
9  
10  
11  
12  
13  
14  
15  
16  
17  
18  
19  
20  
21  
22  
23  
24  
25  
26  
27  
28  
29  
30  
31  
32  
33  
34  
35  
36  
37  
38  
39  
40  
41  
42  
43  
44  
45  
46  
47  
48  
49  
50  
51  
52  
53  
54  
55  
56  
57  
58  
59  
60

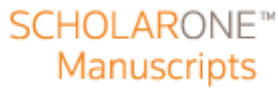

1  
2  
3  
4 The National Cohort of Esophageal Cancer-Pro prospective Cohort Study of Esophageal  
5 Cancer and Precancerous Lesions based on High Risk Population in China(NCEC-HRP):  
6 rationale and design  
7  
8  
9

10  
11 Ru Chen<sup>1</sup>, Shanrui Ma<sup>1</sup>, Chentao Guan<sup>1</sup>, Guihui Song<sup>2</sup>, Qing Ma<sup>1</sup>, Shuanghua Xie<sup>1</sup>, Meng  
12 Wang<sup>1</sup>, Dantong Shao<sup>1</sup>, Xinqing Li<sup>1</sup>, Wenqiang Wei<sup>1\*</sup>  
13  
14  
15

16  
17 1 National Cancer Center/National Clinical Research Center for Cancer/Cancer Hospital,  
18 Chinese Academy of Medical Sciences and Peking Union Medical College, Beijing, China  
19

20  
21 2 Cixian Cancer Hospital/Cixian Institute for Cancer Prevention and Control, Handan,  
22 Hebei, China  
23  
24  
25

26  
27 \*Corresponding author: Wenqiang Wei, MD, PhD, National Cancer Center/National  
28 Clinical Research Center for Cancer/Cancer Hospital, Chinese Academy of Medical  
29 Sciences and Peking Union Medical College, 17 South Panjiayuan Lane, Chaoyang District,  
30 Beijing 100021, China; E-mail: weiwq@cicams.ac.cn  
31  
32  
33  
34  
35  
36

### 37 **Abstract**

38  
39 **Introduction:** Esophageal cancer is one of the most common cancers worldwide and about  
40 50% of all new cases occurred in China. Population-based screening has been conducted  
41 in high risk areas in China since 1970s, however, the difference in screening methods and  
42 protocols, inconsistencies in questionnaires for risk factors investigation, lack of standards  
43 for sample collection and incomplete follow-up information have limited the integration of  
44 the results from previous studies and the sharing of existing resources.  
45  
46  
47  
48  
49

50  
51 **Methods and analysis:** NCEC-HRP is a prospective cohort study of esophageal cancer  
52 screening based on high risk population in China. Eight areas located at eastern, central  
53 and western China representing three economical-geographical regions are selected as  
54  
55  
56  
57  
58  
59  
60

1  
2  
3  
4 screening centers. All local residents aged 40–69 years in the selected areas are invited to  
5 take endoscopic examination and risk factors investigation unless they meet the exclusion  
6 criteria. A total of 100,000 participants will be enrolled by Dec 2020 and all subjects are  
7 to be followed for a long time. This study is designed to be open-ended and has broad  
8 research aims. Summary statistics for baseline information will be reported after the  
9 recruitment is completed. We will develop a serious of standards and guidelines for  
10 esophageal cancer screening during the study. An open and shared research platform linked  
11 with epidemiological databases and biobank will be built up for further research.

12  
13  
14  
15  
16  
17  
18  
19 **Ethics and dissemination:** The study is approved by the Ethics Committee of Cancer  
20 Institute and Hospital, Chinese Academy of Medical Sciences and Peking Union Medical  
21 College (Approval Number 16-171/1250). The findings of the study will be disseminated  
22 through scientific peer-reviewed journals and be provided to the public via the study  
23 website (<http://www.ncec-china.cn>).

24  
25  
26  
27  
28  
29 **Trial registration number:** Chinese Clinical Trial Registry (Registration Number  
30 ChiCTR-EOC-17010553).

### 31 32 33 34 35 **Strengths and limitations of this study**

- 36  
37 1. NCEC-HRP is a prospective large sample cohort of esophageal cancer screening, which  
38 is expected to enroll more than 100,000 subjects from 8 regions in China.
- 39  
40 2. It is an open-ended study with broad research aims, comprehensive exposure data  
41 collection and long-term follow-up.
- 42  
43 3. A serious of standards on esophageal cancer screening and relevant issues will be  
44 developed based on the high quality evidence provide by the study.
- 45  
46 4. An open and shared research platform linked with epidemiological databases and  
47 biobank will be provided to researchers to conduct studies on esophageal cancer and many  
48 other diseases.
- 49  
50 5 The study lacks of risk factors information from non-responders and the findings are  
51  
52  
53  
54  
55  
56  
57  
58  
59  
60

1  
2  
3  
4 limited to high risk areas.

## 5 6 **Introduction**

7  
8 Esophageal cancer remains a significant source of morbidity and mortality worldwide.  
9  
10 According to GLOBOCAN report, there are an estimated 572,034 new cases and 508,585  
11  
12 cancer deaths in 2018, with three quarters of the cases occurring in developing countries  
13  
14 and approximately a half of all new cases occurring in China.<sup>1 2</sup> Esophageal cancer has  
15  
16 been the fifth most common cancer and the fourth most common cause of death in China.<sup>3</sup>  
17  
18 The two main types of esophageal cancer are squamous cell carcinoma (ESCC) and  
19  
20 adenocarcinoma. ESCC accounts for over 90% of all cases of esophageal cancer in China  
21  
22 and causes the majority burden of it.<sup>4 5</sup>

23  
24 Although the exact cause of esophageal cancer is unclear, it is considered as the result of a  
25  
26 multiplicity of demographic factors, diet and lifestyle, environmental and genetic factors.  
27  
28 Esophageal cancer is associated with a poor survival rate, which is mainly due to the late  
29  
30 stage at diagnosis. In China, the survival rate of esophageal cancer is less than 10% when  
31  
32 diagnosed at an advanced stage but is as high as 85% if detected at an earlier stage.<sup>6</sup>

33  
34 Since the 1970s, several screening programs for esophageal cancer have been performed  
35  
36 in the high-risk areas of China and achieved significant effects in the reduction of its  
37  
38 incidence or mortality.<sup>7-12</sup> However, the difference in screening methods and protocols,  
39  
40 inconsistencies in questionnaires for risk factors investigation, lack of standards for sample  
41  
42 collection and incomplete follow-up information have limited the integration of the results  
43  
44 from previous studies and the sharing of existing resources.

45  
46 To this end, we have started the NCEC-HRP cohort, a prospective cohort study of  
47  
48 esophageal cancer and precancerous lesions based on high risk population in China. As an  
49  
50 important part of NCEC (National Cohort of Esophageal Cancer) study, NCEC-HRP  
51  
52 cohort focus on populations in rural high-incidence ESCC areas. Given the excellent  
53  
54 experience of existing large cohorts such as the All of US Research Program,<sup>13</sup> UK  
55  
56 Biobank<sup>14</sup> and China Kadoorie Biobank,<sup>15</sup> NCEC-HRP is designed as a platform without  
57  
58  
59  
60

1  
2  
3  
4 a specific hypothesis, aiming to provide a foundation for future research.

5 The major objectives of NCEC-HRP cohort are: 1) to establish a screening cohort based  
6 on high risk population for esophageal cancer; 2) to develop a serious of standards and  
7 guidelines for esophageal cancer screening, early diagnosis and treatment, risk factors  
8 investigation, sample collection and follow-up; 3) to build up a biobank with database on  
9 epidemiology, diagnosis, treatment and follow-up information; 4) to provide researchers  
10 with a platform for data sharing and promote communication and cooperation in  
11 esophageal cancer research.  
12  
13  
14  
15  
16  
17  
18

## 19 **Methods and analysis**

### 20 **Study design and site selection**

21 NCEC-HRP is a multi-center prospective cohort study on esophageal cancer screening.  
22 The study sites were carefully selected based on the following criteria: 1) located at high  
23 risk areas for esophageal cancer; 2) representing different economical-geographical  
24 regions in China; 3) relative stability of the target population; 4) reliable local  
25 infrastructures including quality of existing cancer registry and death reporting systems,  
26 experienced doctors on esophageal cancer screening, and availability of technology and  
27 equipment for sample collection and storage; 5) long-term local commitment to the project.  
28 A total of eight sites are selected as the study centers (Figure1), including Feicheng of  
29 Shandong province, Yangzhong of Jiangsu province, Cixian of Hebei province, Linxian  
30 and Huaxian of Henan province, Yangcheng of Shanxi province, Yanting of Sichuan  
31 province and Chaoshan of Guangdong province.  
32  
33  
34  
35  
36  
37  
38  
39  
40  
41  
42  
43  
44

### 45 **Enrollment of participants**

46 All men and women aged 40-69 who are permanently residents in the selected study  
47 areas will be identified and invited to participate unless they met the following exclusion  
48 criteria: 1) history of cancer or mental disorder; 2) contraindications for endoscopic  
49 examinations; 3) inability to provide informed consent. Participants' enrollment began on  
50 Jun 1st, 2017 and a total of 100,000 subjects are expected to be enrolled up to December  
51  
52  
53  
54  
55  
56  
57  
58  
59  
60

1  
2  
3  
4 31th, 2020.

### 5 **Endoscopic examination and therapy**

6 All endoscopic examinations and therapies are conducted by well-trained doctors at local  
7 hospitals. The screening procedure follows the recommendation of expert consensus on  
8 early esophageal cancer screening and endoscopic diagnosis and treatment in China.<sup>16</sup>

9 Briefly, screened participants are provided a standard upper gastrointestinal endoscopy  
10 with iodine staining. The entire esophagus and stomach are visually examined and  
11 biopsies are taken from all focal lesions. Two pathologists independently read the biopsy  
12 slides without knowledge of the visual endoscopic findings. Discordances in the  
13 diagnosis are solved by discussion.

14 If early lesions are histologically diagnosed, participants will be recalled to the clinic, and  
15 intervention methods appropriate to the lesions' severity would be used. For esophageal  
16 severe dysplasia/carcinoma in situ or intramucosal carcinomas, endoscopic mucosal  
17 resection and/or endoscopic submucosal dissection treatments will be used as local  
18 therapies. For esophageal cancers, therapies include esophagectomy, radical operation,  
19 radiotherapy, and other conventional treatments.

### 20 **Sample collection**

21 Before endoscopy, blood will be collected into an EDTA containing vacutainer from each  
22 participant in the fasting state, and a small sample of this is used for routine test for  
23 infectious diseases including HBV, HCV, HIV and syphilis. The remaining blood (no less  
24 than 5ml) will be dispensed into four pipes after centrifugation, including two pipes of  
25 blood cell and two pipes of plasma. All samples will be stored at -80°C freezer for long-  
26 term preservation at each local site. Biopsy specimens are fixed in 10% buffered formalin  
27 and embedded in paraffin for storage. Pathological specimens and sections are preserved  
28 for patients with pathological examination. For each participate, saliva samples are also  
29 collected from the oral cavity by drooling and preserved in PreservCyt solution (Hologic,  
30 Bedford, MA, United States) at -70°C for use.



### **Follow up and re-examination**

We combine the active and passive follow-ups to ensure accurate collection of outcome information. For participants diagnosed with esophageal cancer or precancerous lesions during the screening, annual interviews through telephone, home visit or other contact methods will be used to collect the outcome information. Meanwhile, a passive follow-up procedure will be carried out in all participants once a year. We will collect data from local clinical settings, cancer registry system, death surveillance system, as well as medical insurance and claim databases to update the follow-up information. All participants are to be followed for at least a decade. Figure 2 shows the enrollment, screening and follow-up procedure.

Re-examinations are required according to the diagnosis. For patients diagnosed with esophageal mild dysplasia, a re-examination is required in three years, and for those with esophagus moderate dysplasia, an annual re-examination is required. For patients with severe dysplasia or in situ cancer, those who refuse treatment should be followed at least once a year.

### **Data Collection**

Although the cohort is based on esophageal cancer screening population, we plan to use a uniform questionnaire based on the modified China Kadoorie Biobank(CKB) questionnaire to collect the exposure information on various outcomes.<sup>15</sup> CKB is one of the largest cohorts in the world for common chronic diseases, involving more than 0.5 million people in 10 regions of China.<sup>17</sup> Information collected through face-to-face interview will cover a broad range of variables (Table 1), including demographic factors, indicators of socioeconomic status, smoking, alcohol and green tea consumption, diet, indoor air pollution, physical activity, reproductive history (women), sleep status, medical and family history. Blood pressure, heart rate, height, weight are also to be measured.

In consideration of the mental health of screening subjects, we will conduct a pilot survey to investigate the impact of screening detected cancer on participants' psychosocial status.

1  
2  
3  
4 A series of standardized instruments will be used to assess the patients' psychosocial  
5 status from multiple aspects, including GAD-7 (General Anxiety Disorder-7) for anxiety,<sup>18</sup>  
6 PHQ-9 (Patient Health Questionnaire-9) for depression,<sup>19</sup> CD-RISC (The Connor-  
7 Davidson Resilience Scale) for resilience,<sup>20</sup> LES (Life Event Scale) for life event stress,<sup>21</sup>  
8 PSSS (Perceived Social Support Scale) for social support,<sup>22</sup> and SWLS (Satisfaction With  
9 Life Scale) for life satisfaction.<sup>23</sup>  
10  
11  
12  
13  
14

### 15 **Data management**

16  
17 All information collected is entered using a pad-based direct data entry app developed  
18 specifically for the project. The survey system has various built-in functions to avoid  
19 missing items and minimize logic errors during the interview. All data will be uploaded  
20 and stored to the data management platform at National Cancer Center. The platform is  
21 designed to be an open and shared platform for professional research on esophageal cancer  
22 and other health related issues. It will not only include data from questionnaires, but also  
23 include diagnostic images from endoscopy and pathology, and linked with biobank at each  
24 center.  
25  
26  
27  
28  
29  
30  
31  
32

### 33 **Outcome assessment**

34  
35 The NCEC-HRP is an open-ended prospective study with very broad research aims. The  
36 primary objectives of the study are to investigate the population distribution of esophageal  
37 cancer and precancerous lesions in high risk areas and to evaluate the effects of their risk  
38 factors in a range of different circumstances. By storing blood, tissue and saliva samples  
39 from a large number of participants, the study will allow reliable assessment on genetic  
40 factors and related mechanism research in the future. With re-examination and long-term  
41 follow-up, dynamic changes in precancerous lesions can be observed and rare outcomes  
42 such as incident and death cases will also be accumulated, allowing us to further explore  
43 the transformation and progression of precancerous lesions, which will provide evidence  
44 for the management of positive cases and optimization of screening programs.  
45  
46  
47  
48  
49  
50  
51  
52  
53

### 54 **Sample size calculation**

1  
2  
3  
4 According to previous studies, the proportion of precancerous lesions in target screening  
5 population in high risk areas is about 20-25%. Within the prospective cohort that expected  
6 to enroll 100,000 participants, there will be more than 20,000 cases with precancerous  
7 lesions. Assuming the detection rate of precancerous lesions is 20%, to achieve a precision  
8 of 2% with an  $\alpha$  of 0.05, it would need a sample size of 3252 to have 80% power. Since  
9 the sample size of our study is significantly larger, we can safely determine that the study  
10 has adequate statistical power. In the exploring of risk factors for precancerous lesions, for  
11 a factor of 10% exposure level, we will be able to detect a small effect with an odds ratio  
12 of 1.1 and 80% power at the 5% level of significance due to the large sample size.  
13  
14  
15  
16  
17  
18  
19  
20

### 21 **Data analysis plan**

22  
23 We will report summary statistics for baseline variables including demographic,  
24 socioeconomic and behavioral characteristics, general health related information and  
25 family history. The detection rate and the distribution of esophageal cancer and  
26 precancerous lesions in different population characteristics (e.g. age group, gender, site,  
27 screening year et al) will be reported. Parametric and nonparametric tests such as t test,  $\chi^2$   
28 test, Fisher's exact test and Wilcoxon rank sum test will be used for univariate analyses to  
29 identify risk factors associated with interested outcomes. Multivariable regression analyses,  
30 including linear, logistic, Cox proportional hazard and Poisson models will be used to  
31 assess the association between risk factors and outcomes after adjusting for potential  
32 confounders. The tests will be two sided and  $p < 0.05$  will be considered statistically  
33 significant. Data analysis will be undertaken using Stata V14.0 (STATA, College Station,  
34 Texas, USA).  
35  
36  
37  
38  
39  
40  
41  
42  
43  
44  
45

### 46 **Ethics and dissemination**

47  
48 The study is approved by the independent ethics committee of National Cancer  
49 Center/Cancer Hospital, Chinese Academy of Medical Sciences and Peking Union Medical  
50 College (Approval Number 16-171/1250). The transmission, storage and analysis of  
51 health-related personal data and the storage of biological samples within this project will  
52  
53  
54  
55  
56  
57  
58  
59  
60

1  
2  
3  
4 strictly follow the legal requirements for data protection and will be performed under the  
5 supervision of the ethics committee. Data protection and confidentiality will be guaranteed.  
6  
7 The findings of the study will be disseminated through scientific peer-reviewed journals  
8 and be provided to the public via the NECE study website (<http://www.ncec-china.cn>). The  
9  
10 NCEC study group is committed to making the cohort data available to the scientific  
11  
12 researchers worldwide to advance knowledge about the causes, prevention and treatment  
13  
14 of esophageal cancer and other diseases. Researchers wishing to undertake additional  
15  
16 analyses based on the resources are invited to contact us for further discussion. More  
17  
18 information on data sharing and application will be published online in the future.  
19  
20

## 21 **Discussion**

22  
23 Strengths of the study include the prospectively collected exposure data, an exceptionally  
24  
25 large sample size and the opportunity to follow all participants through various resources.  
26  
27 Based on the high quality evidence provide by the study, a serious of standards and  
28  
29 guidelines on esophageal cancer screening, early diagnosis and treatment, risk factors  
30  
31 investigation, sample collection and follow-up will be developed, which may be  
32  
33 implemented to other high risk areas, especially in developing countries in Central and East  
34  
35 Asia and Eastern Africa. In addition, a biobank containing blood, tissue and saliva samples  
36  
37 are to be established, which lays the foundation for further exploration on the genetic risk  
38  
39 factors and relevant mechanism of esophageal cancer and other diseases. Finally, as an  
40  
41 open-ended prospective study, the exposure measurements of this study are not only for  
42  
43 esophageal cancer, but also for many chronic diseases. With the linkage between  
44  
45 epidemiological databases and the biobank, NCEC-HRP will provide an open and shared  
46  
47 research platform for researchers worldwide to conduct studies on esophageal cancer and  
48  
49 many other diseases.

50  
51 A major limitation in this study is the lack of risk factors information from non-attenders  
52  
53 since the investigation is for screening subjects. The questionnaire and sampling method  
54  
55 for non-attenders is still under design. Besides, the study sites are limited to high-incidence  
56  
57  
58  
59  
60

1  
2  
3  
4 areas, so whether the results are applicable to individuals in low-incidence areas remains  
5  
6 to be verified.

7  
8 Unlike the ongoing randomized controlled trials aiming at evaluating the efficacy of  
9  
10 esophageal cancer screening,<sup>24 25</sup> our study focuses on the establishment of databases and  
11  
12 biobank to provide sufficient samples and complete data for subsequent multi-omics  
13  
14 researches. NCEC-HRP is part of the NCEC study and, together with other four cohorts  
15  
16 including standardized diagnosis and treatment of clinical cohort, minimally invasive  
17  
18 treatment of early stage and precancerous lesion cohort, genetic lineage cohort and  
19  
20 prospective cohort based on urban community, will provide a comprehensive research  
21  
22 platform for esophageal cancer and precancerous lesions.  
23  
24

25 **Acknowledgements** We are grateful to all study centers and their staffs whose hard work  
26  
27 made this study possible.

28  
29 **Contributors** RC, SM, CG and WW: study conception and design; SM and SX:  
30  
31 questionnaire design; GS, SX and DS: sample collection method; RC and WW: manuscript  
32  
33 draft; All authors have contributed to research platform design and management and  
34  
35 approved the final manuscript.

36  
37 **Funding** This study is supported by the National Key R&D Program of China  
38  
39 (2016YFC0901400).

40  
41 **Competing interests statement** None declared.

42  
43 **Patient consent** Obtained.

44  
45 **Ethics approval** The NCEC study has been approved by the Ethics Committee of Cancer  
46  
47 Institute and Hospital, Chinese Academy of Medical Sciences and Peking Union Medical  
48  
49 College (Approval Number 16-171/1250).

50  
51 **Word Count** 2788

## 52 53 54 **References**

1. Bray F, Ferlay J, Soerjomataram I, et al. Global Cancer Statistics 2018: GLOBOCAN Estimates of Incidence and Mortality Worldwide for 36 Cancers in 185 Countries. *CA Cancer J Clin* 2018 doi: 10.3322/caac.21492
2. International Agency for Research on Cancer. World Cancer Report 2014. In: BW S, CP W, eds. Lyon: World Health Organization Press, 2014.
3. Chen W, Sun K, Zheng R, et al. Cancer incidence and mortality in China, 2014. *Chin J Cancer Res* 2018;30(1):1-12. doi: 10.21147/j.issn.1000-9604.2018.01.01
4. Abnet CC, Arnold M, Wei WQ. Epidemiology of Esophageal Squamous Cell Carcinoma. *Gastroenterology* 2018;154(2):360-73. doi: 10.1053/j.gastro.2017.08.023
5. Arnold M, Soerjomataram I, Ferlay J, et al. Global incidence of oesophageal cancer by histological subtype in 2012. *Gut* 2015;64(3):381-7. doi: 10.1136/gutjnl-2014-308124
6. Wang GQ, Jiao GG, Chang FB, et al. Long-term results of operation for 420 patients with early squamous cell esophageal carcinoma discovered by screening. *Ann Thorac Surg* 2004;77(5):1740-4. doi: 10.1016/j.athoracsur.2003.10.098
7. Dawsey SM, Fleischer DE, Wang GQ, et al. Mucosal iodine staining improves endoscopic visualization of squamous dysplasia and squamous cell carcinoma of the esophagus in Linxian, China. *Cancer* 1998;83(2):220-31.
8. Dawsey SM, Wang GQ, Weinstein WM, et al. Squamous dysplasia and early esophageal cancer in the Linxian region of China: distinctive endoscopic lesions. *Gastroenterology* 1993;105(5):1333-40.
9. Qin DX, Wang GQ, Zuo JH, et al. Screening of esophageal and gastric cancer by occult blood bead detector. *Cancer* 1993;71(1):216-8.
10. Roth MJ, Liu SF, Dawsey SM, et al. Cytologic detection of esophageal squamous cell carcinoma and precursor lesions using balloon and sponge samplers in asymptomatic adults in Linxian, China. *Cancer* 1997;80(11):2047-59.
11. Shen O, Liu SF, Dawsey SM, et al. Cytologic screening for esophageal cancer: results from 12,877 subjects from a high-risk population in China. *Int J Cancer* 1993;54(2):185-8.
12. Wei WQ, Chen ZF, He YT, et al. Long-Term Follow-Up of a Community Assignment, One-Time Endoscopic Screening Study of Esophageal Cancer in China. *J Clin Oncol* 2015;33(17):1951-7. doi: 10.1200/JCO.2014.58.0423
13. Precision Medicine Initiative (PMI) Working Group. The Precision Medicine Initiative Cohort Program—building a research foundation for 21st century medicine. file:///C:/Users/Chenru/Desktop/pmi-working-group-report-20150917-2.pdf, 2015.
14. Hewitt J, Walters M, Padmanabhan S, et al. Cohort profile of the UK Biobank: diagnosis and characteristics of cerebrovascular disease. *BMJ Open* 2016;6(3):e009161. doi: 10.1136/bmjopen-2015-009161
15. Chen Z, Lee L, Chen J, et al. Cohort profile: the Kadoorie Study of Chronic Disease in China (KSCDC). *Int J Epidemiol* 2005;34(6):1243-9. doi: 10.1093/ije/dyi174
16. Chinese Medical Association Chinese Society of Digestive Endoscopy. Chinese Expert Consensus on Screening and Endoscopic Management of Early Esophageal Cancer (Beijing, 2014). *Chinese Journal of Gastroenterology* 2015;20(4):220-40.

- 1  
2  
3  
4  
5  
6  
7  
8  
9  
10  
11  
12  
13  
14  
15  
16  
17  
18  
19  
20  
21  
22  
23  
24  
25  
26  
27  
28  
29  
30  
31  
32  
33
17. Chen Z, Chen J, Collins R, et al. China Kadoorie Biobank of 0.5 million people: survey methods, baseline characteristics and long-term follow-up. *Int J Epidemiol* 2011;40(6):1652-66. doi: 10.1093/ije/dyr120
  18. Spitzer RL, Kroenke K, Williams JB, et al. A brief measure for assessing generalized anxiety disorder: the GAD-7. *Arch Intern Med* 2006;166(10):1092-7. doi: 10.1001/archinte.166.10.1092
  19. Spitzer RL, Kroenke K, Williams JB. Validation and utility of a self-report version of PRIME-MD: the PHQ primary care study. Primary Care Evaluation of Mental Disorders. Patient Health Questionnaire. *JAMA* 1999;282(18):1737-44.
  20. Connor KM, Davidson JR. Development of a new resilience scale: the Connor-Davidson Resilience Scale (CD-RISC). *Depress Anxiety* 2003;18(2):76-82. doi: 10.1002/da.10113
  21. Mooy JM, de Vries H, Grootenhuys PA, et al. Major stressful life events in relation to prevalence of undetected type 2 diabetes: the Hoorn Study. *Diabetes Care* 2000;23(2):197-201.
  22. Cohen S, Kamarck T, Mermelstein R. A global measure of perceived stress. *J Health Soc Behav* 1983;24(4):385-96.
  23. Diener E, Emmons RA, Larsen RJ, et al. The Satisfaction With Life Scale. *J Pers Assess* 1985;49(1):71-5. doi: 10.1207/s15327752jpa4901\_13
  24. He Z, Liu Z, Liu M, et al. Efficacy of endoscopic screening for esophageal cancer in China (ESECC): design and preliminary results of a population-based randomised controlled trial. *Gut* 2018 doi: 10.1136/gutjnl-2017-315520
  25. Chen W, Zeng H, Chen R, et al. Evaluating efficacy of screening for upper gastrointestinal cancer in China: a study protocol for a randomized controlled trial. *Chin J Cancer Res* 2017;29(4):294-302. doi: 10.21147/j.issn.1000-9604.2017.04.02

## Figure legends

34  
35  
36  
37  
38  
39  
40  
41  
42  
43  
44  
45  
46  
47  
48  
49

Figure 1 Location of selected sites and covering provinces for esophageal cancer screening in China. EC: esophageal cancer; CIS: carcinoma in situ; ESD: endoscopic submucosal dissection; EMR: endoscopic mucosal resection; MBM: Multiband mucosectomy

Figure 2 Enrollment, screening and follow-up procedure

## Table legends

50  
51  
52  
53  
54  
55  
56  
57  
58  
59  
60

Table 1 Summary of questionnaire data collected in the NCEC-HRP

| Category    | Example variables                               |
|-------------|-------------------------------------------------|
| Demographic | gender, race, birthday, address, contact number |

---

information

Socioeconomic information marriage, education, occupation, number of house member, house income, insurance type

Behavioral factors alcohol, smoking, green tea, drinking water, hot food/drinking, pickled food, moldy food, spicy food, nutritional supplement, physical activity

General health related information self-rated health status, current medication, history of cancer, history of digestive disease, history of chronic disease, exposure to indoor air pollution from cooking/heating fuel, exposure to passive smoking, sleep situation

Family history parental age/or age of death, number of siblings, number of children, family history of cancer, family history of chronic disease

Reproductive history (for women) age of first menstrual period, menopause status, history of contraceptive pills use, history of hysterectomy and of ovary/breast surgery

---



1  
2  
3  
4  
5  
6  
7  
8  
9  
10  
11  
12  
13  
14  
15  
16  
17  
18  
19  
20  
21  
22  
23  
24  
25  
26  
27  
28  
29  
30  
31  
32  
33  
34  
35  
36  
37  
38  
39  
40  
41  
42  
43  
44  
45  
46  
47  
48  
49  
50  
51  
52  
53  
54  
55  
56  
57  
58  
59  
60

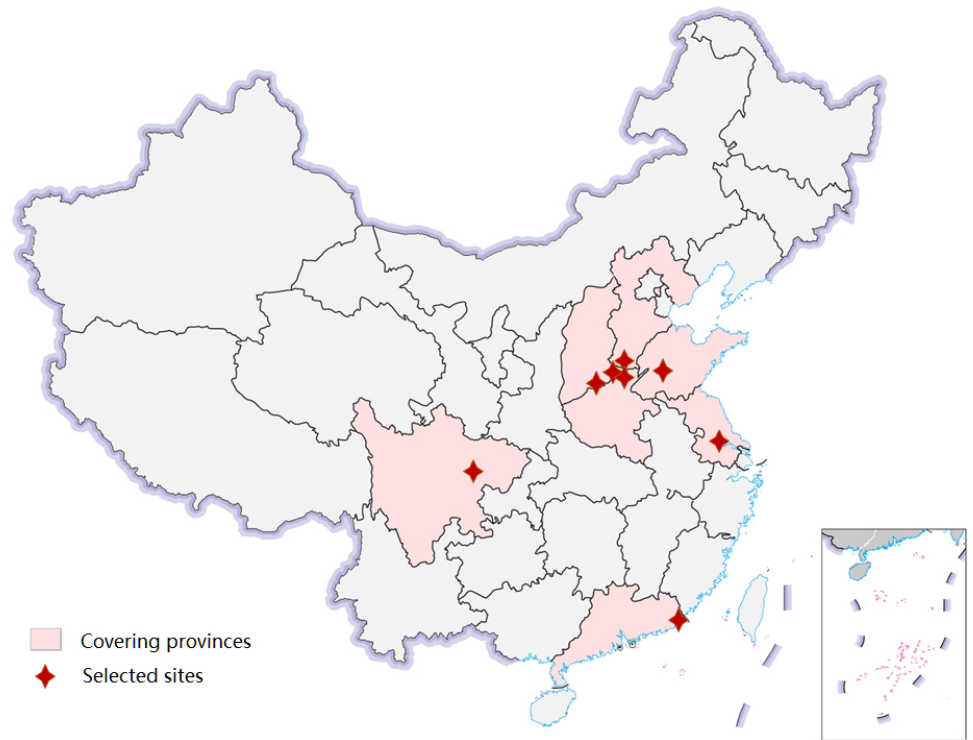

Figure 1 Location of selected sites and covering provinces for esophageal cancer screening in China

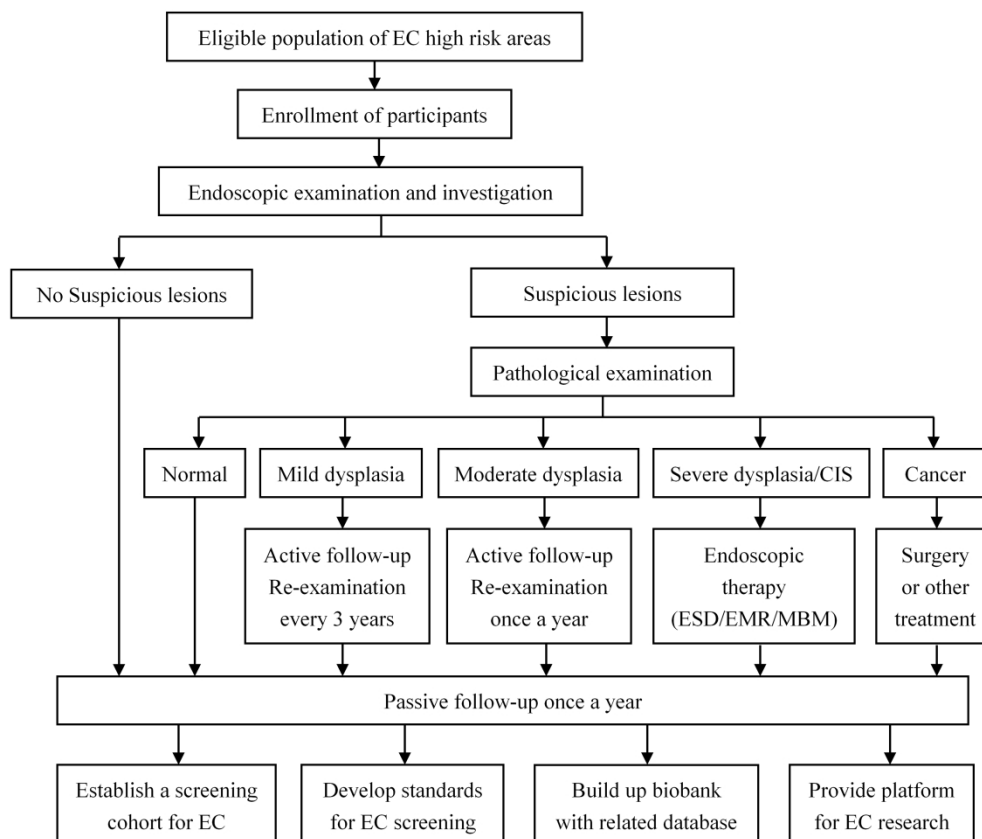

Figure 2 Enrollment, screening and follow-up procedure. EC: esophageal cancer; CIS: carcinoma in situ; ESD: endoscopic submucosal dissection; EMR: endoscopic mucosal resection; MBM: Multiband mucosectomy

# BMJ Open

## The National Cohort of Esophageal Cancer-Prospective Cohort Study of Esophageal Cancer and Precancerous Lesions based on High Risk Population in China(NCEC-HRP): study protocol

|                                 |                                                                                                                                                                                                                                                                                                                                                                                                                                                                                                                                                                                                                                                                                                                                                                                                                                                                                                                                                                                                                                                                                                                                                                                                                                                                                                                                                                                                                                                                                                                                                                                                                                                                        |
|---------------------------------|------------------------------------------------------------------------------------------------------------------------------------------------------------------------------------------------------------------------------------------------------------------------------------------------------------------------------------------------------------------------------------------------------------------------------------------------------------------------------------------------------------------------------------------------------------------------------------------------------------------------------------------------------------------------------------------------------------------------------------------------------------------------------------------------------------------------------------------------------------------------------------------------------------------------------------------------------------------------------------------------------------------------------------------------------------------------------------------------------------------------------------------------------------------------------------------------------------------------------------------------------------------------------------------------------------------------------------------------------------------------------------------------------------------------------------------------------------------------------------------------------------------------------------------------------------------------------------------------------------------------------------------------------------------------|
| Journal:                        | <i>BMJ Open</i>                                                                                                                                                                                                                                                                                                                                                                                                                                                                                                                                                                                                                                                                                                                                                                                                                                                                                                                                                                                                                                                                                                                                                                                                                                                                                                                                                                                                                                                                                                                                                                                                                                                        |
| Manuscript ID                   | bmjopen-2018-027360.R1                                                                                                                                                                                                                                                                                                                                                                                                                                                                                                                                                                                                                                                                                                                                                                                                                                                                                                                                                                                                                                                                                                                                                                                                                                                                                                                                                                                                                                                                                                                                                                                                                                                 |
| Article Type:                   | Protocol                                                                                                                                                                                                                                                                                                                                                                                                                                                                                                                                                                                                                                                                                                                                                                                                                                                                                                                                                                                                                                                                                                                                                                                                                                                                                                                                                                                                                                                                                                                                                                                                                                                               |
| Date Submitted by the Author:   | 22-Jan-2019                                                                                                                                                                                                                                                                                                                                                                                                                                                                                                                                                                                                                                                                                                                                                                                                                                                                                                                                                                                                                                                                                                                                                                                                                                                                                                                                                                                                                                                                                                                                                                                                                                                            |
| Complete List of Authors:       | Chen, Ru; National Cancer Center/National Clinical Research Center for Cancer/Cancer Hospital, Chinese Academy of Medical Sciences and Peking Union Medical College,<br>Ma, Shanrui; National Cancer Center/National Clinical Research Center for Cancer/Cancer Hospital, Chinese Academy of Medical Sciences and Peking Union Medical College<br>Guan, Chentao; National Cancer Center/National Clinical Research Center for Cancer/Cancer Hospital, Chinese Academy of Medical Sciences and Peking Union Medical College<br>Song, Guohui; Cixian Cancer Institute in Handan, Cixian cancer registry<br>Ma, Qing; National Cancer Center/National Clinical Research Center for Cancer/Cancer Hospital, Chinese Academy of Medical Sciences and Peking Union Medical College<br>Xie, Shuanghua; National Cancer Center/National Clinical Research Center for Cancer/Cancer Hospital, Chinese Academy of Medical Sciences and Peking Union Medical College<br>Wang, Meng; National Cancer Center/National Clinical Research Center for Cancer/Cancer Hospital, Chinese Academy of Medical Sciences and Peking Union Medical College<br>Shao, Dantong; National Cancer Center/National Clinical Research Center for Cancer/Cancer Hospital, Chinese Academy of Medical Sciences and Peking Union Medical College<br>Li, Xinqing; National Cancer Center/National Clinical Research Center for Cancer/Cancer Hospital, Chinese Academy of Medical Sciences and Peking Union Medical College<br>Wei, Wen-Qiang; National Cancer Center/National Clinical Research Center for Cancer/Cancer Hospital, Chinese Academy of Medical Sciences and Peking Union Medical College, |
| <b>Primary Subject Heading</b>: | Epidemiology                                                                                                                                                                                                                                                                                                                                                                                                                                                                                                                                                                                                                                                                                                                                                                                                                                                                                                                                                                                                                                                                                                                                                                                                                                                                                                                                                                                                                                                                                                                                                                                                                                                           |
| Secondary Subject Heading:      | Oncology                                                                                                                                                                                                                                                                                                                                                                                                                                                                                                                                                                                                                                                                                                                                                                                                                                                                                                                                                                                                                                                                                                                                                                                                                                                                                                                                                                                                                                                                                                                                                                                                                                                               |
| Keywords:                       | Epidemiology < ONCOLOGY, EPIDEMIOLOGY, Gastrointestinal tumours < GASTROENTEROLOGY                                                                                                                                                                                                                                                                                                                                                                                                                                                                                                                                                                                                                                                                                                                                                                                                                                                                                                                                                                                                                                                                                                                                                                                                                                                                                                                                                                                                                                                                                                                                                                                     |
|                                 |                                                                                                                                                                                                                                                                                                                                                                                                                                                                                                                                                                                                                                                                                                                                                                                                                                                                                                                                                                                                                                                                                                                                                                                                                                                                                                                                                                                                                                                                                                                                                                                                                                                                        |

1  
2  
3  
4  
5  
6  
7  
8  
9  
10  
11  
12  
13  
14  
15  
16  
17  
18  
19  
20  
21  
22  
23  
24  
25  
26  
27  
28  
29  
30  
31  
32  
33  
34  
35  
36  
37  
38  
39  
40  
41  
42  
43  
44  
45  
46  
47  
48  
49  
50  
51  
52  
53  
54  
55  
56  
57  
58  
59  
60

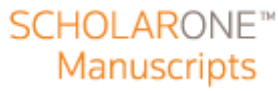

1  
2  
3  
4 The National Cohort of Esophageal Cancer-Pro prospective Cohort Study of Esophageal  
5 Cancer and Precancerous Lesions based on High Risk Population in China(NCEC-  
6 HRP): study protocol  
7  
8  
9

10  
11 Ru Chen<sup>1</sup>, Shanrui Ma<sup>1</sup>, Chentao Guan<sup>1</sup>, Guihui Song<sup>2</sup>, Qing Ma<sup>1</sup>, Shuanghua Xie<sup>1</sup>,  
12 Meng Wang<sup>1</sup>, Dantong Shao<sup>1</sup>, Xinqing Li<sup>1</sup>, Wenqiang Wei<sup>1\*</sup>  
13  
14  
15

16  
17 1 National Cancer Center/National Clinical Research Center for Cancer/Cancer  
18 Hospital, Chinese Academy of Medical Sciences and Peking Union Medical College,  
19 Beijing, China  
20  
21  
22

23 2 Cixian Cancer Hospital/Cixian Institute for Cancer Prevention and Control, Handan,  
24 Hebei, China  
25  
26

27  
28  
29 \*Corresponding author: Wenqiang Wei, MD, PhD, National Cancer Center/National  
30 Clinical Research Center for Cancer/Cancer Hospital, Chinese Academy of Medical  
31 Sciences and Peking Union Medical College, 17 South Panjiayuan Lane, Chaoyang  
32 District, Beijing 100021, China; E-mail: weiwq@cicams.ac.cn  
33  
34  
35  
36  
37  
38

## 39 **Abstract**

40  
41 **Introduction:** Esophageal cancer is one of the most common cancers worldwide and  
42 about 50% of all new cases occurred in China. Population-based screening has been  
43 conducted in high risk areas in China since 1970s, however, the difference in screening  
44 methods and protocols, inconsistencies in questionnaires for risk factors investigation,  
45 lack of standards for sample collection and incomplete follow-up information have  
46 limited the integration of the results from previous studies and the sharing of existing  
47 resources.  
48  
49  
50  
51  
52  
53

54  
55 **Methods and analysis:** NCEC-HRP is a prospective cohort study of esophageal cancer  
56 screening based on high risk population in China supported by the National Key R&D  
57 Program. Eight areas located at eastern, central and western China representing three  
58  
59  
60

1  
2  
3  
4 economical-geographical regions are selected as screening centers. All local residents  
5 aged 40–69 years in the selected areas are invited to take endoscopic examination and  
6 risk factors investigation unless they meet the exclusion criteria. The recruitment began  
7 on Jun 2017 and a total of 100,000 participants will be enrolled by Dec 2020 and all  
8 subjects are to be followed for a long time. This study is designed to be open-ended and  
9 has broad research aims. Summary statistics for baseline information will be reported  
10 after the recruitment is completed. We will develop a serious of standards and  
11 guidelines for esophageal cancer screening during the study. An open and shared  
12 research platform linked with epidemiological databases and biobank will be built up  
13 for further research.

14  
15  
16  
17  
18  
19  
20  
21  
22  
23 **Ethics and dissemination:** The study is approved by the Ethics Committee of Cancer  
24 Institute and Hospital, Chinese Academy of Medical Sciences and Peking Union  
25 Medical College (Approval Number 16-171/1250). The findings of the study will be  
26 disseminated through scientific peer-reviewed journals and be provided to the public  
27 via the study website (<http://www.ncec-china.cn>).

28  
29  
30  
31  
32  
33 **Trial registration number:** Chinese Clinical Trial Registry (Registration Number  
34 ChiCTR-EOC-17010553).

### 35 36 37 38 39 **Strengths and limitations of this study**

- 40  
41  
42 1. NCEC-HRP is a prospective large sample cohort of esophageal cancer screening,  
43 which is expected to enroll more than 100,000 subjects from 8 regions in China.
- 44  
45 2. It is an open-ended study with broad research aims, comprehensive exposure data  
46 collection and long-term follow-up.
- 47  
48 3. A serious of standards on esophageal cancer screening and relevant issues will be  
49 developed based on the high quality evidence provide by the study.
- 50  
51 4. An open and shared research platform linked with epidemiological databases and  
52 biobank will be provided to researchers to conduct studies on esophageal cancer and  
53 many other diseases.
- 54  
55 5 The study lacks of risk factors information from non-responders and the findings are  
56  
57  
58  
59  
60

1  
2  
3  
4 limited to high risk areas.  
5

## 6 **Introduction**

7

8 Esophageal cancer remains a significant source of morbidity and mortality worldwide.  
9  
10 According to GLOBOCAN report, there are an estimated 572,034 new cases and  
11  
12 508,585 cancer deaths in 2018, with three quarters of the cases occurring in developing  
13  
14 countries and approximately a half of all new cases occurring in China.<sup>1 2</sup> Esophageal  
15  
16 cancer has been the fifth most common cancer and the fourth most common cause of  
17  
18 death in China.<sup>3</sup> The incidence rate and mortality of esophageal cancer were  
19  
20 18.85/100,000 and 14.11/100,000 respectively in China in 2014.<sup>3</sup> The two main types  
21  
22 of esophageal cancer are squamous cell carcinoma (ESCC) and adenocarcinoma. ESCC  
23  
24 accounts for over 90% of all cases of esophageal cancer in China and causes the  
25  
26 majority burden of it.<sup>4 5</sup>

27  
28 Although the exact cause of esophageal cancer is unclear, it is considered as the result  
29  
30 of a multiplicity of demographic factors, diet and lifestyle, environmental and genetic  
31  
32 factors. Esophageal cancer is associated with a poor survival rate, which is mainly due  
33  
34 to the late stage at diagnosis. In China, the survival rate of esophageal cancer is less  
35  
36 than 10% when diagnosed at an advanced stage but is as high as 85% if detected at an  
37  
38 earlier stage.<sup>6</sup>

39  
40 Since the 1970s, several screening programs for esophageal cancer have been  
41  
42 performed in the high-risk areas of China and achieved significant effects in the  
43  
44 reduction of its incidence or mortality.<sup>7-12</sup> For example, Wei et al. reported that the  
45  
46 endoscopic screening and intervention significantly reduced mortality caused by  
47  
48 esophageal cancer during 10 year follow-up<sup>12</sup>. And there are two ongoing high-quality  
49  
50 randomized controlled trials in evaluating the efficacy of endoscopic screening for  
51  
52 esophageal cancer in China.<sup>13 14</sup> However, the difference in screening methods and  
53  
54 protocols, inconsistencies in questionnaires for risk factors investigation, lack of  
55  
56 standards for sample collection and incomplete follow-up information have limited the  
57  
58 integration of the results from previous studies and the sharing of existing resources.

59 To this end, we have started the NCEC-HRP cohort, a prospective cohort study of  
60

1  
2  
3  
4 esophageal cancer and precancerous lesions based on high risk population in China. As  
5 an important part of NCEC (National Cohort of Esophageal Cancer) study, NCEC-HRP  
6 cohort focus on populations in rural high-incidence ESCC areas. Given the excellent  
7 experience of existing large cohorts such as the All of US Research Program,<sup>15</sup> UK  
8 Biobank<sup>16</sup> and China Kadoorie Biobank,<sup>17</sup> NCEC-HRP is designed as a platform  
9 without a specific hypothesis, aiming to provide a foundation for future research.

10  
11 Unlike previous cohorts or trails aiming at evaluation the efficacy of screening, NCEC  
12 is a platform project designed to provide the basis for subsequent research. The major  
13 objectives of NCEC-HRP cohort are: 1) to establish a screening cohort based on high  
14 risk population for esophageal cancer; 2) to develop a serious of standards and  
15 guidelines for esophageal cancer screening, early diagnosis and treatment, risk factors  
16 investigation, sample collection and follow-up; 3) to build up a biobank with database  
17 on epidemiology, diagnosis, treatment and follow-up information; 4) to provide  
18 researchers with a platform for data sharing and promote communication and  
19 cooperation in esophageal cancer research. Through standardized processes, NCEC-  
20 HRP can take advantage of resource integration, make rational use of samples and data,  
21 and provide scientific evidence for prevention and control of esophageal cancer.

## 32 **Methods and analysis**

### 33 **Study design and site selection**

34 NCEC-HRP is a multi-center prospective cohort study on esophageal cancer screening.  
35 The study sites were carefully selected based on the following criteria: 1) located at  
36 high risk areas for esophageal cancer; 2) representing different economical-  
37 geographical regions in China; 3) relative stability of the target population; 4) reliable  
38 local infrastructures including quality of existing cancer registry and death reporting  
39 systems, experienced doctors on esophageal cancer screening, and availability of  
40 technology and equipment for sample collection and storage; 5) long-term local  
41 commitment to the project.

42 A total of eight sites are selected as the study centers (Figure1), including Feicheng of  
43 Shandong province, Yangzhong of Jiangsu province, Cixian of Hebei province, Linxian  
44  
45  
46  
47  
48  
49  
50  
51  
52  
53  
54  
55  
56  
57  
58  
59  
60



1  
2  
3 and Huaxian of Henan province, Yangcheng of Shanxi province, Yanting of Sichuan  
4 province and Chaoshan of Guangdong province. The incidence rates among selected  
5 areas ranged between 35.52/100,000 to 81.23/100,000.  
6  
7

### 8 9 **Enrollment of participants**

10 All men and women aged 40-69 who are permanently residents in the selected study  
11 areas will be identified and invited to participate unless they met the following  
12 exclusion criteria: 1) history of cancer or mental disorder; 2) contraindications for  
13 endoscopic examinations; 3) inability to provide informed consent. The recruitment is  
14 based on the village. While promoting the benefits of screening and early diagnosis,  
15 village doctors and local staff will notify all target groups according to household  
16 registration to go to designated hospitals for endoscopic examination. Those who are  
17 willing to participate in the study will be registered and scheduled for screening. If the  
18 hospital is far from the village, the vehicle will be arranged to pick up the participants  
19 to ensure the response rate. If the response rate in a village is too low, a second  
20 notification and screening will be conducted to ensure that the response rate maintains  
21 at a steady rate. Participants' enrollment began on Jun 1st, 2017 and a total of 100,000  
22 subjects are expected to be enrolled up to December 31th, 2020.  
23  
24  
25  
26  
27  
28  
29  
30  
31  
32  
33  
34  
35

### 36 **Endoscopic examination and therapy**

37 All endoscopic examinations and therapies are conducted by well-trained doctors at  
38 local hospitals. The screening procedure follows the recommendation of expert  
39 consensus on early esophageal cancer screening and endoscopic diagnosis and  
40 treatment in China.<sup>18</sup> Briefly, screened participants are provided a standard upper  
41 gastrointestinal endoscopy with iodine staining. The entire esophagus and stomach are  
42 visually examined and biopsies are taken from all focal lesions. Two pathologists  
43 independently read the biopsy slides without knowledge of the visual endoscopic  
44 findings. Discordances in the diagnosis are solved by discussion.  
45  
46  
47  
48  
49  
50  
51  
52  
53

54 If early lesions are histologically diagnosed, participants will be recalled to the clinic,  
55 and intervention methods appropriate to the lesions' severity would be used. For  
56 esophageal severe dysplasia/carcinoma in situ or intramucosal carcinomas, endoscopic  
57 mucosal resection and/or endoscopic submucosal dissection treatments will be used as  
58  
59  
60

1  
2  
3  
4 local therapies. For esophageal cancers, therapies include esophagectomy, radical  
5 operation, radiotherapy, and other conventional treatments.

### 6 7 **Sample collection**

8  
9 Before endoscopy, blood will be collected into an EDTA containing vacutainer from  
10 each participant in the fasting state, and a small sample of this is used for routine test  
11 for infectious diseases including HBV, HCV, HIV and syphilis. The remaining blood  
12 (no less than 5ml) will be dispensed into four pipes after centrifugation, including two  
13 pipes of blood cell and two pipes of plasma. All samples will be stored at -80°C freezer  
14 for long-term preservation at each local site. Biopsy specimens are fixed in 10%  
15 buffered formalin and embedded in paraffin for storage. Pathological specimens and  
16 sections are preserved for patients with pathological examination. For each participate,  
17 saliva samples are also collected from the oral cavity by drooling and preserved in  
18 PreservCyt solution (Hologic, Bedford, MA, United States) at -70°C for use.

### 19 20 **Follow up and re-examination**

21  
22 We combine the active and passive follow-ups to ensure accurate collection of  
23 outcome information. For participants diagnosed with esophageal cancer or  
24 precancerous lesions during the screening, annual interviews through telephone, home  
25 visit or other contact methods will be used to collect the outcome information.

26  
27 Meanwhile, a passive follow-up procedure will be carried out in all participants once  
28 a year. We will collect data from local clinical settings, cancer registry system, death  
29 surveillance system, as well as medical insurance and claim databases to update the  
30 follow-up information. All participants are to be followed for at least a decade. Figure  
31 2 shows the enrollment, screening and follow-up procedure.

32  
33 Re-examinations are required according to the diagnosis. For patients diagnosed with  
34 esophageal mild dysplasia, a re-examination is required in three years, and for those  
35 with esophagus moderate dysplasia, an annual re-examination is required. For patients  
36 with severe dysplasia or in situ cancer, those who refuse treatment should be followed  
37 at least once a year.

### 38 39 **Data Collection**

40  
41 Although the cohort is based on esophageal cancer screening population, we plan to use  
42  
43  
44  
45  
46  
47  
48  
49  
50  
51  
52  
53  
54  
55  
56  
57  
58  
59  
60

1  
2  
3  
4 a uniform questionnaire based on the modified China Kadoorie Biobank(CKB)  
5 questionnaire to collect the exposure information on various outcomes.<sup>17</sup> CKB is one  
6 of the largest cohorts in the world for common chronic diseases, involving more than  
7 0.5 million people in 10 regions of China.<sup>19</sup> Information collected through face-to-face  
8 interview will cover a broad range of variables (Table 1), including demographic factors,  
9 indicators of socioeconomic status, smoking, alcohol and green tea consumption, diet,  
10 indoor air pollution, physical activity, reproductive history (women), sleep status,  
11 medical and family history. We have also developed some specific questionnaire based  
12 on the characteristics of esophageal cancer, such as the history of digestive diseases,  
13 family history of cancer, drinking water, dietary habits (hot food, softness of food,  
14 eating speed), and oral hygiene and so on. Blood pressure, heart rate, height, weight are  
15 also to be measured.

16  
17  
18  
19  
20  
21  
22  
23  
24  
25  
26  
27 In consideration of the mental health of screening subjects, we will conduct a pilot  
28 survey to investigate the impact of screening detected cancer on participants'  
29 psychosocial status. A series of standardized instruments will be used to assess the  
30 patients' psychosocial status from multiple aspects, including GAD-7(General Anxiety  
31 Disorder-7) for anxiety,<sup>20</sup> PHQ-9(Patient Health Questionnaire-9) for depression,<sup>21</sup>  
32 CD-RISC (The Connor-Davidson Resilience Scale) for resilience,<sup>22</sup> LES (Life Event  
33 Scale) for life event stress,<sup>23</sup> PSSS (Perceived Social Support Scale) for social  
34 support,<sup>24</sup> and SWLS (Satisfaction With Life Scale) for life satisfaction.<sup>25</sup>

### 42 **Data management**

43  
44 All information collected is entered using a pad-based direct data entry app developed  
45 specifically for the project. The survey system has various built-in functions to avoid  
46 missing items and minimize logic errors during the interview. All data will be uploaded  
47 and stored to the data management platform at National Cancer Center. The platform  
48 is designed to be an open and shared platform for professional research on esophageal  
49 cancer and other health related issues. It will not only include data from questionnaires,  
50 but also include diagnostic images from endoscopy and pathology, and linked with  
51 biobank at each center.

52  
53  
54  
55  
56  
57  
58  
59  
60 We treated all data as protected health information and stored it securely in an encrypted

1  
2  
3  
4 and password protected database at the management center. The raw data is backed up  
5  
6 in both the pad-based survey system and the platform servers built for the study. The  
7  
8 collection, shipping and receipt of data carriers were tracked by the management center.

### 9 10 **Outcome assessment**

11 The NCEC-HRP is an open-ended prospective study with very broad research aims.  
12  
13 The primary objectives of the study are to investigate the population distribution of  
14  
15 esophageal cancer and precancerous lesions in high risk areas and to evaluate the effects  
16  
17 of their risk factors in a range of different circumstances. By storing blood, tissue and  
18  
19 saliva samples from a large number of participants, the study will allow reliable  
20  
21 assessment on genetic factors and related mechanism research in the future. With re-  
22  
23 examination and long-term follow-up, dynamic changes in precancerous lesions can be  
24  
25 observed and rare outcomes such as incident and death cases will also be accumulated,  
26  
27 allowing us to further explore the transformation and progression of precancerous  
28  
29 lesions, which will provide evidence for the management of positive cases and  
30  
31 optimization of screening programs.

### 32 33 **Quality control**

34 All investigators in the study are trained and assessed for consistency by investigating  
35  
36 the same object with an experienced investigator. Ten percent of the participants will  
37  
38 be randomly selected from the same village with repeat questionnaire and measures on  
39  
40 selected items for quality control. During the course of the survey, the management  
41  
42 center will regular monitor the recruitment rate, the distribution of certain key variables  
43  
44 and the sample collection through the system.

### 45 46 47 **Sample size calculation**

48 According to previous studies, the proportion of precancerous lesions in target  
49  
50 screening population in high risk areas is about 20-25%. Within the prospective cohort  
51  
52 that expected to enroll 100,000 participants, there will be more than 20,000 cases with  
53  
54 precancerous lesions. Assuming the detection rate of precancerous lesions is 20%, to  
55  
56 achieve a precision of 2% with an  $\alpha$  of 0.05, it would need a sample size of 3252 to  
57  
58 have 80% power. Since the sample size of our study is significantly larger, it will has  
59  
60 adequate statistical power for all type of precancerous lesions. In the exploring of risk

1  
2  
3 factors for precancerous lesions, for a factor of 10% exposure level, we will be able to  
4 detect a small effect with an odds ratio of 1.1 and 80% power at the 5% level of  
5 significance due to the large sample size.  
6  
7

### 8 9 **Data analysis plan**

10 We will report summary statistics for baseline variables including demographic,  
11 socioeconomic and behavioral characteristics, general health related information and  
12 family history. The detection rate and the distribution of esophageal cancer and  
13 precancerous lesions in different population characteristics (e.g. age group, gender, site,  
14 screening year et al) will be reported. Parametric and nonparametric tests such as t test,  
15  $\chi^2$  test, Fisher's exact test and Wilcoxon rank sum test will be used for univariate  
16 analyses to identify risk factors associated with interested outcomes. Multivariable  
17 regression analyses, including linear, logistic, Cox proportional hazard and Poisson  
18 models will be used to assess the association between risk factors and outcomes after  
19 adjusting for potential confounders. The tests will be two sided and  $p < 0.05$  will be  
20 considered statistically significant. Data analysis will be undertaken using Stata V14.0  
21 (STATA, College Station, Texas, USA).  
22  
23  
24  
25  
26  
27  
28  
29  
30  
31  
32  
33  
34

### 35 **Ethics and dissemination**

36 The study is approved by the independent ethics committee of National Cancer  
37 Center/Cancer Hospital, Chinese Academy of Medical Sciences and Peking Union  
38 Medical College (Approval Number 16-171/1250). The transmission, storage and  
39 analysis of health-related personal data and the storage of biological samples within  
40 this project will strictly follow the legal requirements for data protection and will be  
41 performed under the supervision of the ethics committee. Data protection and  
42 confidentiality will be guaranteed.  
43  
44  
45  
46  
47  
48  
49

50 The findings of the study will be disseminated through scientific peer-reviewed journals  
51 and be provided to the public via the NECE study website (<http://www.ncec-china.cn>).  
52 The NCEC study group is committed to making the cohort data available to the  
53 scientific researchers worldwide to advance knowledge about the causes, prevention  
54 and treatment of esophageal cancer and other diseases. Researchers wishing to  
55 undertake additional analyses based on the resources are invited to contact us for further  
56  
57  
58  
59  
60

1  
2  
3  
4 discussion. More information on data sharing and application will be published online  
5  
6 in the future.

### 7 **Patient and Public Involvement**

8  
9 The protocol of this study was discussed and developed by a multidisciplinary team of  
10  
11 experts including epidemiologists, clinicians, statisticians, and computer engineers as  
12  
13 well as field investigators, but no patients or public were involved in the design phase.  
14

### 15 **Discussion**

16  
17 Strengths of the study include the prospectively collected exposure data, an  
18  
19 exceptionally large sample size and the opportunity to follow all participants through  
20  
21 various resources. Based on the high quality evidence provide by the study, a serious  
22  
23 of standards and guidelines on esophageal cancer screening, early diagnosis and  
24  
25 treatment, risk factors investigation, sample collection and follow-up will be developed,  
26  
27 which may be implemented to other high risk areas, especially in developing countries  
28  
29 in Central and East Asia and Eastern Africa. In addition, a biobank containing blood,  
30  
31 tissue and saliva samples are to be established, which lays the foundation for further  
32  
33 exploration on the genetic risk factors and relevant mechanism of esophageal cancer  
34  
35 and other diseases. Finally, as an open-ended prospective study, the exposure  
36  
37 measurements of this study are not only for esophageal cancer, but also for many  
38  
39 chronic diseases. With the linkage between epidemiological databases and the biobank,  
40  
41 NCEC-HRP will provide an open and shared research platform for researchers  
42  
43 worldwide to conduct studies on esophageal cancer and many other diseases.

44  
45 A major limitation in this study is the lack of risk factors information from non-  
46  
47 attenders since the investigation is for screening subjects. The questionnaire and  
48  
49 sampling method for non-attenders is still under design. Even though we can also obtain  
50  
51 the baseline and outcome information of non-participants by referring to various data  
52  
53 sources to ensure the feasibility of the research and the accuracy of the research results.  
54  
55 Besides, the study sites are limited to high-incidence areas, so whether the results are  
56  
57 applicable to individuals in low-incidence areas remains to be verified.

58  
59 Although the existing cohorts and ongoing trials may bring new insights into  
60  
61 esophageal cancer, the lack of standardization and sharing will limit the promotion and

1  
2  
3  
4 application of results. Therefore, there is an urgent need for a large cohort to be  
5 established with uniform standards on esophageal cancer screening, early diagnosis and  
6 treatment, risk factors investigation, sample collection and follow-up. This study  
7 focuses on the establishment of databases and biobank to provide sufficient samples  
8 and complete data for subsequent multi-omics researches. With large sample size and  
9 long-term follow-up, we can have a more comprehensive understanding of the  
10 epidemiology of esophageal cancer and precancerous lesions, including the incidence  
11 and mortality, risk factors, progress and survival et al. NCEC-HRP is part of the NCEC  
12 study and, together with other four cohorts including standardized diagnosis and  
13 treatment of clinical cohort, minimally invasive treatment of early stage and  
14 precancerous lesion cohort, genetic lineage cohort and prospective cohort based on  
15 urban community, will provide a comprehensive research platform for esophageal  
16 cancer and precancerous lesions.  
17  
18  
19  
20  
21  
22  
23  
24  
25  
26  
27  
28  
29  
30

31 **Acknowledgements** We are grateful to all study centers and their staffs whose hard  
32 work made this study possible.  
33

34 **Contributors** Ru Chen, Shanrui Ma, Chentao Guan and Wenqiang Wei: study  
35 conception and design; Shanrui Ma: questionnaire for psychosocial status; Shuanghua  
36 Xie: questionnaire for baseline risk factors investigation; Guohui Song: biobank  
37 establishment; Guohui Song, Shuanghua Xie and Dantong Shao: sample collection  
38 method; Chentao Guan, Qing Ma and Meng Wang: screening procedure; Ru Chen: data  
39 management and analysis; Xinqing Li: quality control; Ru Chen and Wenqiang Wei:  
40 manuscript draft. All authors have contributed to research platform design and  
41 management and approved the final manuscript.  
42  
43  
44  
45  
46  
47  
48  
49

50 **Funding** This study is supported by the National Key R&D Program of China  
51 (2016YFC0901400).  
52  
53

54 **Competing interests statement** None declared.  
55

56 **Patient consent** Obtained.  
57

58 **Ethics approval** The NCEC study has been approved by the Ethics Committee of  
59 Cancer Institute and Hospital, Chinese Academy of Medical Sciences and Peking  
60

1  
2  
3  
4 Union Medical College (Approval Number 16-171/1250).

5  
6 **Word Count 2788**

7  
8  
9 **References**

- 10  
11  
12  
13 1. Bray F, Ferlay J, Soerjomataram I, et al. Global Cancer Statistics 2018: GLOBOCAN Estimates of  
14 Incidence and Mortality Worldwide for 36 Cancers in 185 Countries. *CA Cancer J Clin* 2018 doi:  
15 10.3322/caac.21492
- 16  
17 2. International Agency for Research on Cancer. World Cancer Report 2014. In: BW S, CP W, eds. Lyon:  
18 World Health Organization Press, 2014.
- 19  
20 3. Chen W, Sun K, Zheng R, et al. Cancer incidence and mortality in China, 2014. *Chin J Cancer Res*  
21 2018;30(1):1-12. doi: 10.21147/j.issn.1000-9604.2018.01.01
- 22  
23 4. Abnet CC, Arnold M, Wei WQ. Epidemiology of Esophageal Squamous Cell Carcinoma.  
24 *Gastroenterology* 2018;154(2):360-73. doi: 10.1053/j.gastro.2017.08.023
- 25  
26 5. Arnold M, Soerjomataram I, Ferlay J, et al. Global incidence of oesophageal cancer by histological  
27 subtype in 2012. *Gut* 2015;64(3):381-7. doi: 10.1136/gutjnl-2014-308124
- 28  
29 6. Wang GQ, Jiao GG, Chang FB, et al. Long-term results of operation for 420 patients with early  
30 squamous cell esophageal carcinoma discovered by screening. *Ann Thorac Surg*  
31 2004;77(5):1740-4. doi: 10.1016/j.athoracsur.2003.10.098
- 32  
33 7. Dawsey SM, Fleischer DE, Wang GQ, et al. Mucosal iodine staining improves endoscopic visualization  
34 of squamous dysplasia and squamous cell carcinoma of the esophagus in Linxian, China. *Cancer*  
35 1998;83(2):220-31.
- 36  
37 8. Dawsey SM, Wang GQ, Weinstein WM, et al. Squamous dysplasia and early esophageal cancer in the  
38 Linxian region of China: distinctive endoscopic lesions. *Gastroenterology* 1993;105(5):1333-40.
- 39  
40 9. Qin DX, Wang GQ, Zuo JH, et al. Screening of esophageal and gastric cancer by occult blood bead  
41 detector. *Cancer* 1993;71(1):216-8.
- 42  
43 10. Roth MJ, Liu SF, Dawsey SM, et al. Cytologic detection of esophageal squamous cell carcinoma and  
44 precursor lesions using balloon and sponge samplers in asymptomatic adults in Linxian, China.  
45 *Cancer* 1997;80(11):2047-59.
- 46  
47 11. Shen O, Liu SF, Dawsey SM, et al. Cytologic screening for esophageal cancer: results from 12,877  
48 subjects from a high-risk population in China. *Int J Cancer* 1993;54(2):185-8.
- 49  
50 12. Wei WQ, Chen ZF, He YT, et al. Long-Term Follow-Up of a Community Assignment, One-Time  
51 Endoscopic Screening Study of Esophageal Cancer in China. *J Clin Oncol* 2015;33(17):1951-7.  
52 doi: 10.1200/JCO.2014.58.0423
- 53  
54 13. He Z, Liu Z, Liu M, et al. Efficacy of endoscopic screening for esophageal cancer in China (ESECC):  
55 design and preliminary results of a population-based randomised controlled trial. *Gut* 2018 doi:  
56 10.1136/gutjnl-2017-315520
- 57  
58 14. Chen W, Zeng H, Chen R, et al. Evaluating efficacy of screening for upper gastrointestinal cancer in  
59 China: a study protocol for a randomized controlled trial. *Chin J Cancer Res* 2017;29(4):294-  
60 302. doi: 10.21147/j.issn.1000-9604.2017.04.02
- 61  
62 15. Precision Medicine Initiative (PMI) Working Group. The Precision Medicine Initiative Cohort  
63 Program-building a research foundation for 21st century medicine.



- file:///C:/Users/Chenru/Desktop/pmi-working-group-report-20150917-2.pdf, 2015.
16. Hewitt J, Walters M, Padmanabhan S, et al. Cohort profile of the UK Biobank: diagnosis and characteristics of cerebrovascular disease. *BMJ Open* 2016;6(3):e009161. doi: 10.1136/bmjopen-2015-009161
  17. Chen Z, Lee L, Chen J, et al. Cohort profile: the Kadoorie Study of Chronic Disease in China (KSCDC). *Int J Epidemiol* 2005;34(6):1243-9. doi: 10.1093/ije/dyi174
  18. Chinese Medical Association Chinese Society of Digestive Endoscopy. Chinese Expert Consensus on Screening and Endoscopic Management of Early Esophageal Cancer (Beijing, 2014). *Chinese Journal of Gastroenterology* 2015;20(4):220-40.
  19. Chen Z, Chen J, Collins R, et al. China Kadoorie Biobank of 0.5 million people: survey methods, baseline characteristics and long-term follow-up. *Int J Epidemiol* 2011;40(6):1652-66. doi: 10.1093/ije/dyr120
  20. Spitzer RL, Kroenke K, Williams JB, et al. A brief measure for assessing generalized anxiety disorder: the GAD-7. *Arch Intern Med* 2006;166(10):1092-7. doi: 10.1001/archinte.166.10.1092
  21. Spitzer RL, Kroenke K, Williams JB. Validation and utility of a self-report version of PRIME-MD: the PHQ primary care study. Primary Care Evaluation of Mental Disorders. Patient Health Questionnaire. *JAMA* 1999;282(18):1737-44.
  22. Connor KM, Davidson JR. Development of a new resilience scale: the Connor-Davidson Resilience Scale (CD-RISC). *Depress Anxiety* 2003;18(2):76-82. doi: 10.1002/da.10113
  23. Mooy JM, de Vries H, Grootenhuys PA, et al. Major stressful life events in relation to prevalence of undetected type 2 diabetes: the Hoorn Study. *Diabetes Care* 2000;23(2):197-201.
  24. Cohen S, Kamarck T, Mermelstein R. A global measure of perceived stress. *J Health Soc Behav* 1983;24(4):385-96.
  25. Diener E, Emmons RA, Larsen RJ, et al. The Satisfaction With Life Scale. *J Pers Assess* 1985;49(1):71-5. doi: 10.1207/s15327752jpa4901\_13

## Figure legends

Figure 1 Location of selected sites and covering provinces for esophageal cancer screening in China. EC: esophageal cancer; CIS: carcinoma in situ; ESD: endoscopic submucosal dissection; EMR: endoscopic mucosal resection; MBM: Multiband mucosectomy

Figure 2 Enrollment, screening and follow-up procedure

## Table legends

Table 1 Summary of questionnaire data collected in the NCEC-HRP

| Category    | Example variables                               |
|-------------|-------------------------------------------------|
| Demographic | gender, race, birthday, address, contact number |

---

|    |                      |                                                                  |
|----|----------------------|------------------------------------------------------------------|
| 1  | information          |                                                                  |
| 2  |                      |                                                                  |
| 3  |                      |                                                                  |
| 4  | Socioeconomic        | marriage, education, occupation, number of house member,         |
| 5  | information          | house income, insurance type                                     |
| 6  |                      |                                                                  |
| 7  | Behavioral factors   | alcohol, smoking, green tea, drinking water, hot                 |
| 8  |                      | food/drinking, pickled food, moldy food, spicy food,             |
| 9  |                      | nutritional supplement, physical activity                        |
| 10 |                      |                                                                  |
| 11 | General health       | self-rated health status, current medication, history of cancer, |
| 12 | related information  | history of digestive disease, history of chronic disease,        |
| 13 |                      | exposure to indoor air pollution from cooking/heating fuel,      |
| 14 |                      | exposure to passive smoking, sleep situation                     |
| 15 |                      |                                                                  |
| 16 | Family history       | parental age/or age of death, number of siblings, number of      |
| 17 |                      | children, family history of cancer, family history of chronic    |
| 18 |                      | disease                                                          |
| 19 |                      |                                                                  |
| 20 | Reproductive history | age of first menstrual period, menopause status, history of      |
| 21 | (for women)          | contraceptive pills use, history of hysterectomy and of          |
| 22 |                      | ovary/breast surgery                                             |

---

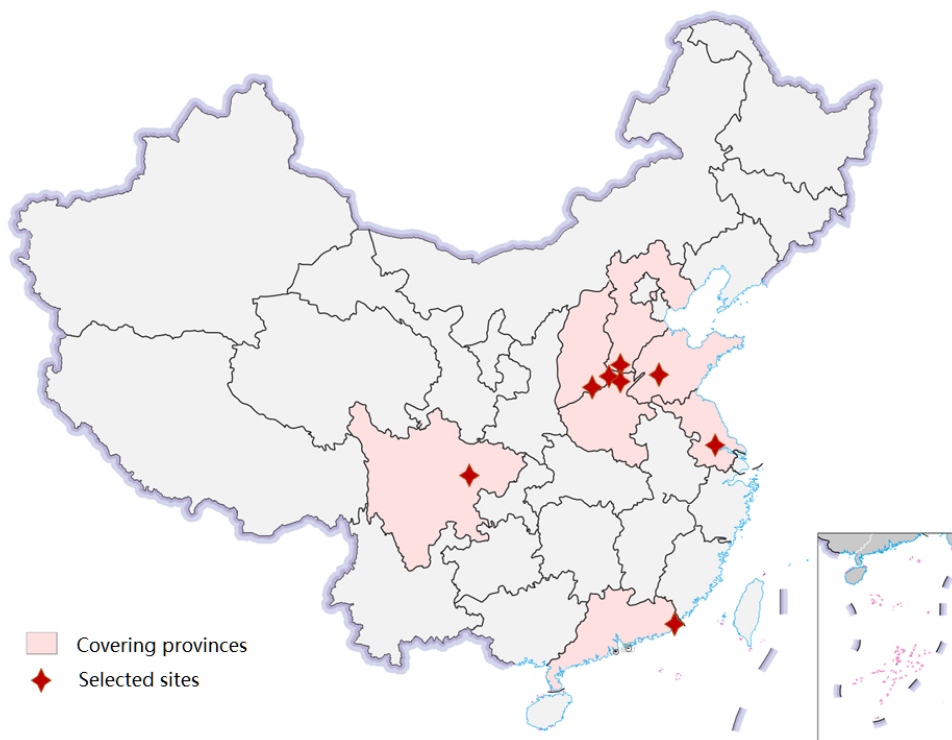

Figure 1 Location of selected sites and covering provinces for esophageal cancer screening in China



Figure 2 Enrollment, screening and follow-up procedure. EC: esophageal cancer; CIS: carcinoma in situ; ESD: endoscopic submucosal dissection; EMR: endoscopic mucosal resection; MBM: Multiband mucosectomy

# BMJ Open

## The National Cohort of Esophageal Cancer-Prospective Cohort Study of Esophageal Cancer and Precancerous Lesions based on High Risk Population in China(NCEC-HRP): study protocol

|                                 |                                                                                                                                                                                                                                                                                                                                                                                                                                                                                                                                                                                                                                                                                                                                                                                                                                                                                                                                                                                                                                                                                                                                                                                                                                                                                                                                                                                                                                                                                                                                                                                                                                                                        |
|---------------------------------|------------------------------------------------------------------------------------------------------------------------------------------------------------------------------------------------------------------------------------------------------------------------------------------------------------------------------------------------------------------------------------------------------------------------------------------------------------------------------------------------------------------------------------------------------------------------------------------------------------------------------------------------------------------------------------------------------------------------------------------------------------------------------------------------------------------------------------------------------------------------------------------------------------------------------------------------------------------------------------------------------------------------------------------------------------------------------------------------------------------------------------------------------------------------------------------------------------------------------------------------------------------------------------------------------------------------------------------------------------------------------------------------------------------------------------------------------------------------------------------------------------------------------------------------------------------------------------------------------------------------------------------------------------------------|
| Journal:                        | <i>BMJ Open</i>                                                                                                                                                                                                                                                                                                                                                                                                                                                                                                                                                                                                                                                                                                                                                                                                                                                                                                                                                                                                                                                                                                                                                                                                                                                                                                                                                                                                                                                                                                                                                                                                                                                        |
| Manuscript ID                   | bmjopen-2018-027360.R2                                                                                                                                                                                                                                                                                                                                                                                                                                                                                                                                                                                                                                                                                                                                                                                                                                                                                                                                                                                                                                                                                                                                                                                                                                                                                                                                                                                                                                                                                                                                                                                                                                                 |
| Article Type:                   | Protocol                                                                                                                                                                                                                                                                                                                                                                                                                                                                                                                                                                                                                                                                                                                                                                                                                                                                                                                                                                                                                                                                                                                                                                                                                                                                                                                                                                                                                                                                                                                                                                                                                                                               |
| Date Submitted by the Author:   | 24-Feb-2019                                                                                                                                                                                                                                                                                                                                                                                                                                                                                                                                                                                                                                                                                                                                                                                                                                                                                                                                                                                                                                                                                                                                                                                                                                                                                                                                                                                                                                                                                                                                                                                                                                                            |
| Complete List of Authors:       | Chen, Ru; National Cancer Center/National Clinical Research Center for Cancer/Cancer Hospital, Chinese Academy of Medical Sciences and Peking Union Medical College,<br>Ma, Shanrui; National Cancer Center/National Clinical Research Center for Cancer/Cancer Hospital, Chinese Academy of Medical Sciences and Peking Union Medical College<br>Guan, Chentao; National Cancer Center/National Clinical Research Center for Cancer/Cancer Hospital, Chinese Academy of Medical Sciences and Peking Union Medical College<br>Song, Guohui; Cixian Cancer Institute in Handan, Cixian cancer registry<br>Ma, Qing; National Cancer Center/National Clinical Research Center for Cancer/Cancer Hospital, Chinese Academy of Medical Sciences and Peking Union Medical College<br>Xie, Shuanghua; National Cancer Center/National Clinical Research Center for Cancer/Cancer Hospital, Chinese Academy of Medical Sciences and Peking Union Medical College<br>Wang, Meng; National Cancer Center/National Clinical Research Center for Cancer/Cancer Hospital, Chinese Academy of Medical Sciences and Peking Union Medical College<br>Shao, Dantong; National Cancer Center/National Clinical Research Center for Cancer/Cancer Hospital, Chinese Academy of Medical Sciences and Peking Union Medical College<br>Li, Xinqing; National Cancer Center/National Clinical Research Center for Cancer/Cancer Hospital, Chinese Academy of Medical Sciences and Peking Union Medical College<br>Wei, Wen-Qiang; National Cancer Center/National Clinical Research Center for Cancer/Cancer Hospital, Chinese Academy of Medical Sciences and Peking Union Medical College, |
| <b>Primary Subject Heading</b>: | Epidemiology                                                                                                                                                                                                                                                                                                                                                                                                                                                                                                                                                                                                                                                                                                                                                                                                                                                                                                                                                                                                                                                                                                                                                                                                                                                                                                                                                                                                                                                                                                                                                                                                                                                           |
| Secondary Subject Heading:      | Oncology                                                                                                                                                                                                                                                                                                                                                                                                                                                                                                                                                                                                                                                                                                                                                                                                                                                                                                                                                                                                                                                                                                                                                                                                                                                                                                                                                                                                                                                                                                                                                                                                                                                               |
| Keywords:                       | Epidemiology < ONCOLOGY, EPIDEMIOLOGY, Gastrointestinal tumours < GASTROENTEROLOGY                                                                                                                                                                                                                                                                                                                                                                                                                                                                                                                                                                                                                                                                                                                                                                                                                                                                                                                                                                                                                                                                                                                                                                                                                                                                                                                                                                                                                                                                                                                                                                                     |
|                                 |                                                                                                                                                                                                                                                                                                                                                                                                                                                                                                                                                                                                                                                                                                                                                                                                                                                                                                                                                                                                                                                                                                                                                                                                                                                                                                                                                                                                                                                                                                                                                                                                                                                                        |

1  
2  
3  
4  
5  
6  
7  
8  
9  
10  
11  
12  
13  
14  
15  
16  
17  
18  
19  
20  
21  
22  
23  
24  
25  
26  
27  
28  
29  
30  
31  
32  
33  
34  
35  
36  
37  
38  
39  
40  
41  
42  
43  
44  
45  
46  
47  
48  
49  
50  
51  
52  
53  
54  
55  
56  
57  
58  
59  
60



1  
2  
3  
4 The National Cohort of Esophageal Cancer-Prospective Cohort Study of Esophageal  
5 Cancer and Precancerous Lesions based on High Risk Population in China(NCEC-  
6 HRP): study protocol  
7  
8  
9

10  
11 Ru Chen<sup>1</sup>, Shanrui Ma<sup>1</sup>, Chentao Guan<sup>1</sup>, Guihui Song<sup>2</sup>, Qing Ma<sup>1</sup>, Shuanghua Xie<sup>1</sup>,  
12 Meng Wang<sup>1</sup>, Dantong Shao<sup>1</sup>, Xinqing Li<sup>1</sup>, Wenqiang Wei<sup>1\*</sup>  
13  
14  
15

16  
17 1 National Cancer Center/National Clinical Research Center for Cancer/Cancer  
18 Hospital, Chinese Academy of Medical Sciences and Peking Union Medical College,  
19 Beijing, China  
20  
21  
22

23 2 Cixian Cancer Hospital/Cixian Institute for Cancer Prevention and Control, Handan,  
24 Hebei, China  
25  
26  
27

28  
29 \*Corresponding author: Wenqiang Wei, MD, PhD, National Cancer Center/National  
30 Clinical Research Center for Cancer/Cancer Hospital, Chinese Academy of Medical  
31 Sciences and Peking Union Medical College, 17 South Panjiayuan Lane, Chaoyang  
32 District, Beijing 100021, China; E-mail: weiwq@cicams.ac.cn  
33  
34  
35  
36  
37  
38

## 39 **Abstract**

40  
41 **Introduction:** Esophageal cancer is one of the most common cancers worldwide and  
42 about 50% of all new cases occurred in China. Population-based screening has been  
43 conducted in high risk areas in China since 1970s, however, a few factors have limited  
44 the integration of the results from previous studies and the sharing of existing resources,  
45 such as the difference in screening methods and protocols, inconsistencies in  
46 questionnaires for risk factors investigation, lack of standards for sample collection and  
47 incomplete follow-up information.  
48  
49  
50  
51  
52  
53

54 **Methods and analysis:** NCEC-HRP is a prospective cohort study of esophageal cancer  
55 screening based on high risk population in China supported by the National Key R&D  
56 Program. Eight areas located at eastern, central and western China are selected as  
57  
58  
59  
60

1  
2  
3  
4 screening centers to represent three economical-geographical regions. All local  
5 residents aged 40–69 years in the selected areas are invited to take endoscopic  
6 examination and risk factors investigation unless they meet the exclusion criteria. The  
7 recruitment began on Jun 2017 and a total of 100,000 participants will be enrolled by  
8 Dec 2020 and all subjects will be followed for a long time. This study is designed as  
9 open-ended and has broad research aims. Summary statistics for baseline information  
10 will be reported after the completion of recruitment. We will develop a serious of  
11 standards and guidelines for esophageal cancer screening during the study. An open  
12 and shared research platform linked with epidemiological databases and biobank will  
13 be built up for further research.

14  
15  
16  
17  
18  
19  
20  
21  
22  
23 **Ethics and dissemination:** The study is approved by the Ethics Committee of Cancer  
24 Institute and Hospital, Chinese Academy of Medical Sciences and Peking Union  
25 Medical College (Approval Number 16-171/1250). The findings of the study will be  
26 disseminated through scientific peer-reviewed journals as well as the public via the  
27 study website (<http://www.ncec-china.cn>).

28  
29  
30  
31  
32  
33 **Trial registration number:** Chinese Clinical Trial Registry (Registration Number  
34 ChiCTR-EOC-17010553).

### 35 36 37 38 39 **Strengths and limitations of this study**

- 40  
41 1. NCEC-HRP is a prospective cohort of esophageal cancer screening with large sample  
42 size, which is expected to enroll more than 100,000 subjects from 8 regions in China.
- 43  
44 2. It is an open-ended study with broad research aims, comprehensive exposure data  
45 collection and long-term follow-up.
- 46  
47 3. A serious of standards on esophageal cancer screening and relevant issues will be  
48 developed based on the high quality evidence provided by this study.
- 49  
50 4. An open and shared research platform linked with epidemiological databases and  
51 biobank will be offered to researchers to conduct studies on esophageal cancer and  
52 many other diseases.
- 53  
54 5 The study lacks of risk factors information from non-responders and the findings are  
55  
56  
57  
58  
59  
60



1  
2  
3  
4 limited to high risk areas in China.

## 5 6 **Introduction**

7  
8 Esophageal cancer remains a significant source of morbidity and mortality worldwide.  
9  
10 According to GLOBOCAN report, there are an estimated 572,034 new cases and  
11  
12 508,585 cancer deaths in 2018, with approximately a half of all new cases occurring in  
13  
14 China.<sup>1,2</sup> Esophageal cancer has been the fifth most common cancer and the fourth most  
15  
16 common cause of death in China.<sup>3</sup> The incidence rate and mortality of esophageal  
17  
18 cancer were 18.85/100,000 and 14.11/100,000 respectively in China in 2014.<sup>3</sup> The two  
19  
20 main types of esophageal cancer are squamous cell carcinoma (ESCC) and  
21  
22 adenocarcinoma, with ESCC accounting for over 90% of all cases of esophageal cancer  
23  
24 in<sup>4,5</sup>

25  
26 Although the exact cause of esophageal cancer is unclear, it is considered as the result  
27  
28 of a multiplicity of demographic factors, diet and lifestyle, environmental and genetic  
29  
30 factors. Esophageal cancer has a poor survival rate mainly result from the late stage at  
31  
32 diagnosis. In China, its survival rate is less than 10% if diagnosed at an advanced stage  
33  
34 but is as high as 85% if detected at an earlier stage.<sup>6</sup>

35  
36 Since the 1970s, several screening programs for esophageal cancer have been  
37  
38 conducted in the high-risk areas of China and achieved significant effects in the  
39  
40 reduction of its incidence or mortality.<sup>7-12</sup> For example, Wei et al. reported that the  
41  
42 endoscopic screening and intervention significantly reduced mortality caused by  
43  
44 esophageal cancer during 10 year follow-up<sup>12</sup>. Two more high-quality randomized  
45  
46 controlled trials are ongoing to evaluate the efficacy of endoscopic screening for  
47  
48 esophageal cancer in China.<sup>13,14</sup> However, a few factors have limited the integration of  
49  
50 the results from previous studies and the sharing of existing resources, such as the  
51  
52 difference in screening methods and protocols, inconsistencies in questionnaires for  
53  
54 risk factors investigation, lack of standards for sample collection and incomplete  
55  
56 follow-up information.

57  
58 To this end, we started the National Cohort of Esophageal Cancer-Pro prospective Cohort  
59  
60 Study of Esophageal Cancer and Precancerous Lesions based on High Risk Population

1  
2  
3  
4 in China(NCEC-HRP) cohort, a prospective cohort study of esophageal cancer and  
5 precancerous lesions based on high risk population in China. As an important part of  
6 NCEC (National Cohort of Esophageal Cancer) study, NCEC-HRP cohort focuses on  
7 populations in rural areas with high-incidence of ESCC. Learning from existing large  
8 cohorts such as the All of US Research Program,<sup>15</sup> UK Biobank<sup>16</sup> and China Kadoorie  
9 Biobank,<sup>17</sup> NCEC-HRP is designed as a platform without a specific hypothesis in order  
10 to facilitate future research.

11  
12  
13  
14  
15  
16  
17 The major objectives of NCEC-HRP cohort are: 1) to establish a screening cohort based  
18 on high risk population for esophageal cancer; 2) to develop a series of standards and  
19 guidelines for esophageal cancer screening, early diagnosis and treatment, risk factors  
20 investigation, sample collection and follow-up; 3) to build up a biobank with database  
21 on epidemiology, diagnosis, treatment and follow-up information; 4) to provide  
22 researchers with a platform for data sharing and promote communication and  
23 cooperation in esophageal cancer research. Through standardized processes, NCEC-  
24 HRP could take advantage of resource integration, make rational use of samples and  
25 data, and provide scientific evidence for prevention and control of esophageal cancer.

## 35 **Methods and analysis**

### 36 **Study design and site selection**

37  
38 NCEC-HRP is a multi-center prospective cohort about esophageal cancer screening.  
39 The study sites were carefully selected with the following criteria: 1) located at high  
40 risk areas for esophageal cancer; 2) representing different economical-geographical  
41 regions in China; 3) relative stability of the target population; 4) reliable local  
42 infrastructures including quality of existing cancer registry and death reporting systems,  
43 experienced doctors on esophageal cancer screening, and availability of technology and  
44 equipment for sample collection and storage; 5) long-term local commitment to the  
45 project.

46  
47  
48  
49  
50  
51  
52  
53  
54  
55 A total of eight sites are selected as the study centers (Figure1), including Feicheng of  
56 Shandong province, Yangzhong of Jiangsu province, Cixian of Hebei province, Linxian  
57 and Huaxian of Henan province, Yangcheng of Shanxi province, Yanting of Sichuan  
58  
59  
60

1  
2  
3  
4 province and Chaoshan of Guangdong province. The incidence rates among selected  
5 areas ranged from 35.52/100,000 to 81.23/100,000.

### 6 7 **Enrollment of participants**

8  
9 All men and women aged 40-69 who are permanently residents in the selected study  
10 sites will be identified and invited to participate unless they met the following  
11 exclusion criteria: 1) history of cancer or mental disorder; 2) contraindications for  
12 endoscopic examinations; 3) inability to provide informed consent. The recruitment is  
13 conducted village by village. While propagandizing the benefits of screening and  
14 early diagnosis, village doctors and local staff will also notify all target groups to go  
15 to designated hospitals for endoscopic examination. Those who are willing to do will  
16 be registered and scheduled for screening. If the hospital is far from the village, the  
17 vehicle will be arranged to pick up the participants to ensure the response rate. If the  
18 response rate of a village is too low (under 30%), a second mobilization will be  
19 conducted to improve response rate. Participants' enrollment began on Jun 1st, 2017  
20 and a total of 100,000 subjects are expected to be included up to December 31th,  
21 2020.

### 22 23 **Endoscopic examination and therapy**

24 All endoscopic examinations and therapies are conducted by well-trained doctors at  
25 local hospitals. The screening procedure follows the recommendation of expert  
26 consensus on early esophageal cancer screening and endoscopic diagnosis and  
27 treatment in China.<sup>18</sup> Briefly, screened participants are provided a standard upper  
28 gastrointestinal endoscopy with iodine staining. The entire esophagus and stomach are  
29 visually examined and biopsies are taken from all focal lesions. Two pathologists  
30 independently read the biopsy slides without knowledge of the visual endoscopic  
31 findings. Discordances in the diagnosis are solved by discussion.

32  
33 If early lesions are histologically diagnosed, participants will be recalled to the clinic,  
34 and intervention methods appropriate to the lesions' severity would be used. For  
35 esophageal severe dysplasia/carcinoma in situ or intramucosal carcinomas, endoscopic  
36 mucosal resection and/or endoscopic submucosal dissection treatments will be used as  
37 local therapies. For esophageal cancers, therapies include esophagectomy, radical

1  
2  
3  
4 operation, radiotherapy, and other conventional treatments.

### 5 6 **Sample collection**

7 Before endoscopy, blood will be collected into an EDTA containing vacutainer from  
8 each participant in the fasting state. A small portion is used for routine test for infectious  
9 diseases including HBV, HCV, HIV and syphilis, while the remaining (no less than 5ml)  
10 will be dispensed into four pipes after centrifugation, including two pipes of blood cell  
11 and two pipes of plasma. All samples will be stored at -80°C freezer for long-term  
12 preservation at each local site. Biopsy specimens are fixed in 10% buffered formalin  
13 and embedded in paraffin for storage. Pathological specimens and sections are  
14 preserved for patients with pathological examination. For each participate, saliva  
15 samples are also collected from the oral cavity by drooling and preserved in PreservCyt  
16 solution (Hologic, Bedford, MA, United States) at -70°C for use.

### 17 18 **Follow up and re-examination**

19 We combine the active and passive follow-ups to accurately collect outcome  
20 information. For participants diagnosed with esophageal cancer or precancerous  
21 lesions during the screening, annual interviews will be used to collect the outcome  
22 information through telephone, home visit or other contact methods. Meanwhile, a  
23 passive follow-up procedure will be carried out for all participants once a year. We  
24 will also collect additional data from local clinical settings, cancer registry system,  
25 death surveillance system, as well as medical insurance and claim databases to update  
26 the follow-up information. All participants will be followed for at least a decade.

27 Figure 2 shows the enrollment, screening and follow-up procedure.

28 Re-examinations are required according to the diagnosis. For patients diagnosed with  
29 esophageal mild dysplasia, a re-examination is required in three years, and for those  
30 with esophagus moderate dysplasia, an annual re-examination is required. For patients  
31 with severe dysplasia or in situ cancer, those who refuse treatment should be followed  
32 at least once a year.

### 33 34 **Data Collection**

35 Although the cohort is based on esophageal cancer screening population, we plan to use  
36 a uniform questionnaire based on the modified China Kadoorie Biobank (CKB)  
37  
38  
39  
40  
41  
42  
43  
44  
45  
46  
47  
48  
49  
50  
51  
52  
53  
54  
55  
56  
57  
58  
59  
60

questionnaire to collect various exposure information,<sup>17</sup> because that CKB is one of the largest cohorts in the world for common chronic diseases, involving more than 0.5 million people in 10 regions of China.<sup>19</sup> Information collected through face-to-face interview will cover a broad range of variables (Table 1), including demographic factors, indicators of socioeconomic status, smoking, alcohol and green tea consumption, diet, indoor air pollution, physical activity, reproductive history (women), sleep status, medical and family history. Some specific questionnaire were also developed according to the characteristics of esophageal cancer, such as the history of digestive diseases, family history of cancer, drinking water, dietary habits (hot food, softness of food, eating speed), and oral hygiene. Blood pressure, heart rate, height, weight will also be measured.

In consideration of the mental health of screening subjects, we will conduct a pilot survey to investigate the impact of screening detected cancer on participants' psychosocial status. A series of standardized instruments will be used to assess the patients' psychosocial status from multiple aspects, including GAD-7 (General Anxiety Disorder-7) for anxiety,<sup>20</sup> PHQ-9 (Patient Health Questionnaire-9) for depression,<sup>21</sup> CD-RISC (The Connor-Davidson Resilience Scale) for resilience,<sup>22</sup> LES (Life Event Scale) for life event stress,<sup>23</sup> PSSS (Perceived Social Support Scale) for social support,<sup>24</sup> and SWLS (Satisfaction With Life Scale) for life satisfaction.<sup>25</sup>

### **Data management**

All information collected is entered using a pad-based direct data entry app that was developed specifically for the project. The survey system has various built-in functions to avoid missing items and minimize logic errors during the interview. All data will be uploaded and stored into the data management platform at National Cancer Center. We aimed to design an open platform for professional research on esophageal cancer and other health related issues. The shared information contain data from questionnaires, diagnostic images from endoscopy and pathology, and biobank information.

We treated all data as protected health information and stored it securely as an encrypted and password protected database at the management center. The raw data is backed up in both the pad-based survey system and the specific platform servers. The

1  
2  
3  
4 collection, shipping and receipt of data carriers were tracked by the management center.

### 5 **Outcome assessment**

6  
7 The primary objectives are to investigate the population distribution of esophageal  
8 cancer and precancerous lesions in high risk areas and to evaluate the effects of risk  
9 factors in a range of different circumstances. By storing blood, tissue and saliva samples,  
10 the study will facilitate reliable assessment on genetic factors and related mechanism  
11 research. With re-examination and long-term follow-up, dynamic changes in  
12 precancerous lesions can be observed and rare outcomes such as incident and death  
13 cases will also be accumulated, allowing us to further explore the transformation and  
14 progression of precancerous lesions. This will offer evidence for managing positive  
15 cases and optimizing screening programs.  
16  
17  
18  
19  
20  
21  
22  
23  
24

### 25 **Quality control**

26  
27 All investigators in the study are trained and assessed for consistency by investigating  
28 the same object with an experienced investigator. Ten percent of the participants will  
29 be randomly selected from the same village with repeat questionnaire and measures on  
30 selected items for quality control. During survey, the management center will regular  
31 monitor the recruitment rate, the distribution of certain key variables and the sample  
32 collection through the system. The key quality assurance and quality control procedures  
33 in the study is summarized in supplementary table 1.  
34  
35  
36  
37  
38  
39  
40

### 41 **Sample size calculation**

42  
43 According to previous studies, the proportion of precancerous lesions in target  
44 screening population in high risk areas is about 20-25%. Within the prospective cohort  
45 that expected to enroll 100,000 participants, there will be more than 20,000 cases with  
46 precancerous lesions. Assuming the detection rate of precancerous lesions is 20%, to  
47 achieve a precision of 2% with an  $\alpha$  of 0.05, it would need a sample size of 3252 to  
48 achieve a power of 80% Therefore, we will has adequate power for all type of  
49 precancerous lesions. In the exploring of risk factors for precancerous lesions, for a  
50 factor of 10% exposure level, we could also detect a quite small effect ( odds ratio of  
51 1.1)with 80% power at the 5% level of significance.  
52  
53  
54  
55  
56  
57  
58  
59  
60

### **Data analysis plan**

1  
2  
3  
4 First, we will present summary statistics for baseline variables including demographic,  
5 socioeconomic and behavioral characteristics, general health related information and  
6 family history. Senconde, the detection rate and the distribution of esophageal cancer  
7 and precancerous lesions among different population characteristics (e.g. age group,  
8 gender, site, screening year et al) will be reported. Third, parametric and nonparametric  
9 tests such as t test,  $\chi^2$  test, Fisher's exact test and Wilcoxon rank sum test will be applied  
10 for univariate analyses to identify risk factors associated with interested outcomes.  
11 Fourth, multivariable regression analyses, including linear, logistic, Cox proportional  
12 hazard and Poisson models will be selected as appropriate to assess the association  
13 between risk factors and outcomes with adjustment for potential confounders. The tests  
14 will be two sided and  $p < 0.05$  will be considered statistically significant. Data analysis  
15 will be undertaken using Stata V14.0 (STATA, College Station, Texas, USA).

### 26 **Ethics and dissemination**

27  
28  
29 The study is approved by the independent ethics committee of National Cancer  
30 Center/Cancer Hospital, Chinese Academy of Medical Sciences and Peking Union  
31 Medical College (Approval Number 16-171/1250). The transmission, storage and  
32 analysis of health-related personal data and the storage of biological samples within  
33 this project will strictly follow the legal requirements for data protection under the  
34 supervision of the ethics committee. Data protection and confidentiality will be  
35 guaranteed.

36  
37 The findings of the study will be disseminated through scientific peer-reviewed journals  
38 as well as the public via the NECE study website (<http://www.ncec-china.cn>). The  
39 NECE study group is committed to making the cohort data available to the scientific  
40 researchers worldwide to produce advance knowledge about the causes, prevention and  
41 treatment of esophageal cancer and other diseases. Researchers with related interests  
42 are invited to contact us for further discussion. More information on data sharing and  
43 application will be published online in the future.

### 54 **Patient and Public Involvement**

55  
56  
57 The protocol of this study was discussed and developed by a multidisciplinary team of  
58 experts including epidemiologists, clinicians, statisticians, and computer engineers as  
59  
60

1  
2  
3  
4 well as field investigators, but no patients or public were involved in the design phase.

## 5 **Discussion**

6  
7 Strengths of the study include the prospectively collected exposure data, an  
8 exceptionally large sample size and the opportunity to follow all participants through  
9 various resources. Based on the high quality evidence provide by the study, we would  
10 also develop a serious of standards and guidelines on esophageal cancer screening, early  
11 diagnosis and treatment, risk factors investigation, sample collection and follow-up.  
12 Those achievements might be implemented to other high risk areas, especially in  
13 developing countries in Central and East Asia and Eastern Africa. In addition, the  
14 biobank with blood, tissue and saliva will lay the foundation for further exploration on  
15 the genetic risk factors and relevant mechanism of esophageal cancer and other diseases.  
16 Finally, as an open-ended prospective study, the exposure measurements are not only  
17 designed for esophageal cancer, but also for many other chronic diseases. Through  
18 linking epidemiological databases tothe biobank, NCEC-HRP will also provide an open  
19 and shared research platform for researchers worldwide to conduct studies on  
20 esophageal cancer and many other diseases.  
21  
22  
23  
24  
25  
26  
27  
28  
29  
30  
31  
32  
33

34 A major limitation in this study is the lack of risk factors information from non-  
35 attenders. However, a questionnaire and sampling method for non-attenders is already  
36 under design. We also try to obtain the baseline and outcome information of non-  
37 participants by referring to various date sources to improve the accuracy of the research  
38 results from multiple aspects. Second, our cohort are limited to high-incidence areas,  
39 which might affect its extrapolation in low-incidence areas.  
40  
41  
42  
43  
44  
45

46 The preexisting cohorts and ongoing trials bring new insights into esophageal cancer,  
47 however, the lack of standardization and sharing limit the popularization and  
48 application of results. A large cohort is urgently needed which should own uniform  
49 standards on esophageal cancer screening, early diagnosis and treatment, risk factors  
50 investigation, sample collection and follow-up. Our cohort is aimed to establish  
51 databases and biobank in order to offer sufficient samples and complete data for  
52 subsequent multi-omics researches. With large sample size and long-term follow-up,  
53 we could achieve a more comprehensive understanding of the epidemiology of  
54  
55  
56  
57  
58  
59  
60



1  
2  
3  
4 esophageal cancer and precancerous lesions, including the incidence and mortality, risk  
5 factors, progress and survival et al. NCEC-HRP is part of the NCEC study and, together  
6 with other four cohorts including standardized diagnosis and treatment of clinical  
7 cohort, minimally invasive treatment of early stage and precancerous lesion cohort,  
8 genetic lineage cohort and prospective cohort based on urban community, will construct  
9 a comprehensive research platform for esophageal cancer and precancerous lesions.  
10  
11  
12  
13  
14  
15  
16

17 **Acknowledgements** We are grateful to all study centers and their staffs whose hard  
18 work made this study possible.  
19

20  
21 **Contributors** Ru Chen, Shanrui Ma, Chentao Guan and Wenqiang Wei: study  
22 conception and design; Shanrui Ma: questionnaire for psychosocial status; Shuanghua  
23 Xie: questionnaire for baseline risk factors investigation; Guohui Song: biobank  
24 establishment; Guohui Song, Shuanghua Xie and Dantong Shao: sample collection  
25 method; Chentao Guan, Qing Ma and Meng Wang: screening procedure; Ru Chen: data  
26 management and analysis; Xinqing Li: quality control; Ru Chen and Wenqiang Wei:  
27 manuscript draft. All authors have contributed to research platform design and  
28 management and approved the final manuscript.  
29  
30  
31  
32  
33  
34  
35

36  
37 **Funding** This study is supported by the National Key R&D Program of China  
38 (2016YFC0901400), National Natural Science Foundation of China (81573224) and  
39 PUMC Youth Fund and the Fundamental Research Funds for the Central Universities  
40 (2017330004).  
41  
42  
43

44 **Competing interests statement** None declared.  
45

46 **Patient consent** Obtained.  
47

48 **Ethics approval** The NCEC study has been approved by the Ethics Committee of  
49 Cancer Institute and Hospital, Chinese Academy of Medical Sciences and Peking  
50 Union Medical College (Approval Number 16-171/1250).  
51  
52  
53

54 **Word Count** 2788  
55  
56  
57

58 **References**  
59  
60

1. Bray F, Ferlay J, Soerjomataram I, et al. Global Cancer Statistics 2018: GLOBOCAN Estimates of Incidence and Mortality Worldwide for 36 Cancers in 185 Countries. *CA Cancer J Clin* 2018 doi: 10.3322/caac.21492
2. International Agency for Research on Cancer. World Cancer Report 2014. In: BW S, CP W, eds. Lyon: World Health Organization Press, 2014.
3. Chen W, Sun K, Zheng R, et al. Cancer incidence and mortality in China, 2014. *Chin J Cancer Res* 2018;30(1):1-12. doi: 10.21147/j.issn.1000-9604.2018.01.01
4. Abnet CC, Arnold M, Wei WQ. Epidemiology of Esophageal Squamous Cell Carcinoma. *Gastroenterology* 2018;154(2):360-73. doi: 10.1053/j.gastro.2017.08.023
5. Arnold M, Soerjomataram I, Ferlay J, et al. Global incidence of oesophageal cancer by histological subtype in 2012. *Gut* 2015;64(3):381-7. doi: 10.1136/gutjnl-2014-308124
6. Wang GQ, Jiao GG, Chang FB, et al. Long-term results of operation for 420 patients with early squamous cell esophageal carcinoma discovered by screening. *Ann Thorac Surg* 2004;77(5):1740-4. doi: 10.1016/j.athoracsur.2003.10.098
7. Dawsey SM, Fleischer DE, Wang GQ, et al. Mucosal iodine staining improves endoscopic visualization of squamous dysplasia and squamous cell carcinoma of the esophagus in Linxian, China. *Cancer* 1998;83(2):220-31.
8. Dawsey SM, Wang GQ, Weinstein WM, et al. Squamous dysplasia and early esophageal cancer in the Linxian region of China: distinctive endoscopic lesions. *Gastroenterology* 1993;105(5):1333-40.
9. Qin DX, Wang GQ, Zuo JH, et al. Screening of esophageal and gastric cancer by occult blood bead detector. *Cancer* 1993;71(1):216-8.
10. Roth MJ, Liu SF, Dawsey SM, et al. Cytologic detection of esophageal squamous cell carcinoma and precursor lesions using balloon and sponge samplers in asymptomatic adults in Linxian, China. *Cancer* 1997;80(11):2047-59.
11. Shen O, Liu SF, Dawsey SM, et al. Cytologic screening for esophageal cancer: results from 12,877 subjects from a high-risk population in China. *Int J Cancer* 1993;54(2):185-8.
12. Wei WQ, Chen ZF, He YT, et al. Long-Term Follow-Up of a Community Assignment, One-Time Endoscopic Screening Study of Esophageal Cancer in China. *J Clin Oncol* 2015;33(17):1951-7. doi: 10.1200/JCO.2014.58.0423
13. He Z, Liu Z, Liu M, et al. Efficacy of endoscopic screening for esophageal cancer in China (ESECC): design and preliminary results of a population-based randomised controlled trial. *Gut* 2018 doi: 10.1136/gutjnl-2017-315520
14. Chen W, Zeng H, Chen R, et al. Evaluating efficacy of screening for upper gastrointestinal cancer in China: a study protocol for a randomized controlled trial. *Chin J Cancer Res* 2017;29(4):294-302. doi: 10.21147/j.issn.1000-9604.2017.04.02
15. Precision Medicine Initiative (PMI) Working Group. The Precision Medicine Initiative Cohort Program-building a research foundation for 21st century medicine. file:///C:/Users/Chenru/Desktop/pmi-working-group-report-20150917-2.pdf, 2015.
16. Hewitt J, Walters M, Padmanabhan S, et al. Cohort profile of the UK Biobank: diagnosis and characteristics of cerebrovascular disease. *BMJ Open* 2016;6(3):e009161. doi: 10.1136/bmjopen-2015-009161
17. Chen Z, Lee L, Chen J, et al. Cohort profile: the Kadoorie Study of Chronic Disease in China (KSCDC). *Int J Epidemiol* 2005;34(6):1243-9. doi: 10.1093/ije/dyi174
18. Chinese Medical Association Chinese Society of Digestive Endoscopy. Chinese Expert Consensus on

- Screening and Endoscopic Management of Early Esophageal Cancer (Beijing, 2014). *Chinese Journal of Gastroenterology* 2015;20(4):220-40.
19. Chen Z, Chen J, Collins R, et al. China Kadoorie Biobank of 0.5 million people: survey methods, baseline characteristics and long-term follow-up. *Int J Epidemiol* 2011;40(6):1652-66. doi: 10.1093/ije/dyr120
20. Spitzer RL, Kroenke K, Williams JB, et al. A brief measure for assessing generalized anxiety disorder: the GAD-7. *Arch Intern Med* 2006;166(10):1092-7. doi: 10.1001/archinte.166.10.1092
21. Spitzer RL, Kroenke K, Williams JB. Validation and utility of a self-report version of PRIME-MD: the PHQ primary care study. Primary Care Evaluation of Mental Disorders. Patient Health Questionnaire. *JAMA* 1999;282(18):1737-44.
22. Connor KM, Davidson JR. Development of a new resilience scale: the Connor-Davidson Resilience Scale (CD-RISC). *Depress Anxiety* 2003;18(2):76-82. doi: 10.1002/da.10113
23. Mooy JM, de Vries H, Grootenhuys PA, et al. Major stressful life events in relation to prevalence of undetected type 2 diabetes: the Hoorn Study. *Diabetes Care* 2000;23(2):197-201.
24. Cohen S, Kamarck T, Mermelstein R. A global measure of perceived stress. *J Health Soc Behav* 1983;24(4):385-96.
25. Diener E, Emmons RA, Larsen RJ, et al. The Satisfaction With Life Scale. *J Pers Assess* 1985;49(1):71-5. doi: 10.1207/s15327752jpa4901\_13

## Figure legends

Figure 1 Location of selected sites and covering provinces for esophageal cancer screening in China. EC: esophageal cancer; CIS: carcinoma in situ; ESD: endoscopic submucosal dissection; EMR: endoscopic mucosal resection; MBM: Multiband mucosectomy

Figure 2 Enrollment, screening and follow-up procedure

## Table legends

Table 1 Summary of questionnaire data collected in the NCEC-HRP

| Category                  | Example variables                                                                     |
|---------------------------|---------------------------------------------------------------------------------------|
| Demographic information   | gender, race, birthday, address, contact number                                       |
| Socioeconomic information | marriage, education, occupation, number of house member, house income, insurance type |
| Behavioral factors        | alcohol, smoking, green tea, drinking water, consumption of                           |

---

|                      |        |                                                                   |
|----------------------|--------|-------------------------------------------------------------------|
|                      |        | certain food (fresh vegetables, meat/poultry, fish/sea food,      |
|                      |        | egg, soybean, dairy products, beverages, pickled food, moldy      |
|                      |        | food, spicy food), dietary habits (hot food, softness of food,    |
|                      |        | eating speed), nutritional supplement, physical activity          |
| General              | health | self-rated health status (self-reported health status, oral       |
| related information  |        | hygiene, history of trauma, history of cancer and related         |
|                      |        | therapy, history of digestive disease, <i>Helicobacter pylori</i> |
|                      |        | infection status, history of chronic disease), current            |
|                      |        | medication(non-steroidal anti-inflammatory drugs, steroidal       |
|                      |        | anti-inflammatory drugs, acid inhibitor, antibiotics),            |
|                      |        | exposure to indoor air pollution from cooking/heating fuel,       |
|                      |        | exposure to passive smoking, sleep situation                      |
| Family history       |        | parental age/or age of death, number of siblings, number of       |
|                      |        | children, family history of cancer, family history of chronic     |
|                      |        | disease                                                           |
| Reproductive history |        | age of first menstrual period, menopause status, history of       |
| (for women)          |        | contraceptive pills use, history of hysterectomy and of           |
|                      |        | ovary/breast surgery                                              |

---

Supplementary table 1 Summary of quality assurance and quality control procedures in NCEC-HRP study

1  
2  
3  
4  
5  
6  
7  
8  
9  
10  
11  
12  
13  
14  
15  
16  
17  
18  
19  
20  
21  
22  
23  
24  
25  
26  
27  
28  
29  
30  
31  
32  
33  
34  
35  
36  
37  
38  
39  
40  
41  
42  
43  
44  
45  
46  
47  
48  
49  
50  
51  
52  
53  
54  
55  
56  
57  
58  
59  
60

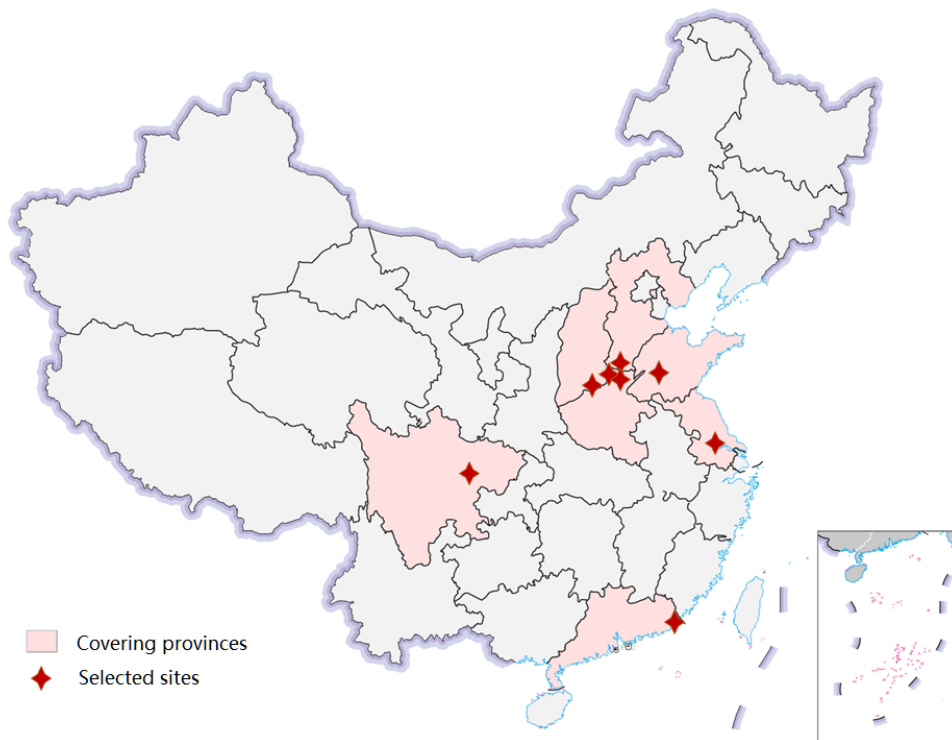

Figure 1 Location of selected sites and covering provinces for esophageal cancer screening in China

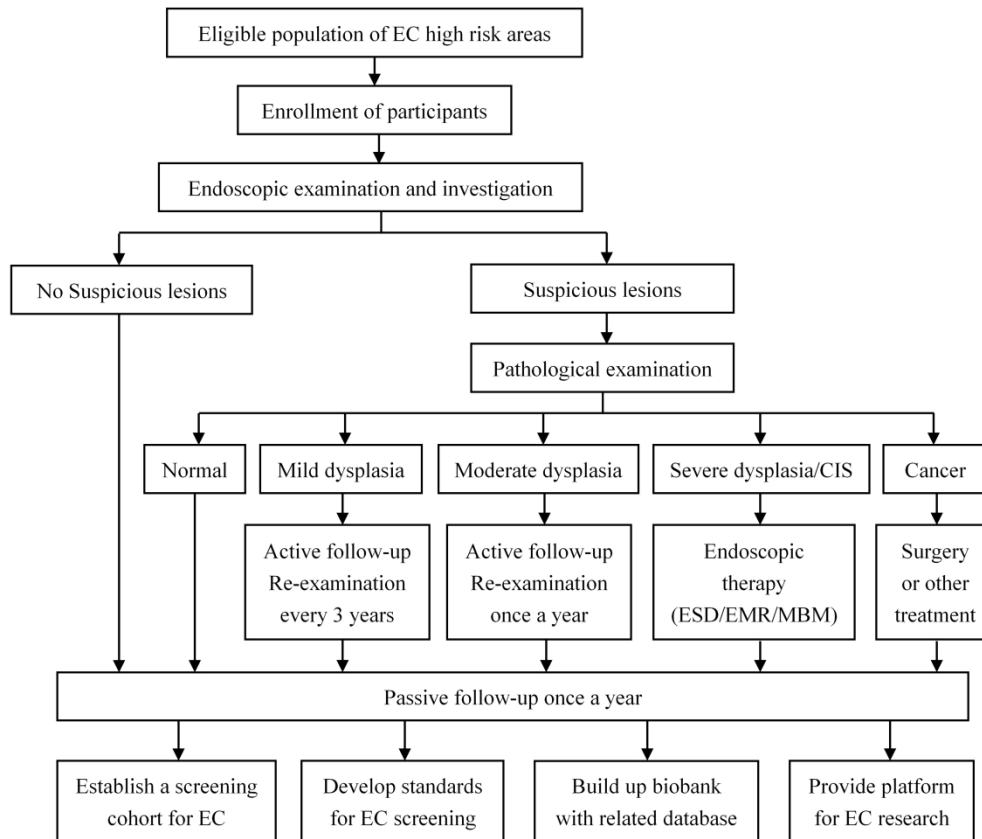

Figure 2 Enrollment, screening and follow-up procedure. EC: esophageal cancer; CIS: carcinoma in situ; ESD: endoscopic submucosal dissection; EMR: endoscopic mucosal resection; MBM: Multiband mucosectomy

Supplementary table 1 Summary of quality assurance and quality control procedures in NCEC-HRP study

| Aspects                      | Quality assurance and quality control procedures                                                                                                                                                                                                                                                                                                                                                                                                                                                                                                                                                                                                                                                                                                                                                                                                                                        |
|------------------------------|-----------------------------------------------------------------------------------------------------------------------------------------------------------------------------------------------------------------------------------------------------------------------------------------------------------------------------------------------------------------------------------------------------------------------------------------------------------------------------------------------------------------------------------------------------------------------------------------------------------------------------------------------------------------------------------------------------------------------------------------------------------------------------------------------------------------------------------------------------------------------------------------|
| Research design              | <p data-bbox="331 213 622 250">Protocol development</p> <ul data-bbox="353 268 2152 416" style="list-style-type: none"> <li data-bbox="353 268 2152 363">• The objectives, research design, participants' recruitment, sample size, as well as other basic points of the research protocol were developed by the NCEC Project Committee and its Advisory Committees.</li> <li data-bbox="353 379 1715 416">• Small adjustments to the initial protocol were performed during the operationalization of the research.</li> </ul> <p data-bbox="331 432 864 469">Development of the Operations Manual</p> <ul data-bbox="353 485 2152 580" style="list-style-type: none"> <li data-bbox="353 485 2152 580">• The Operations Manual with a clear and detailed description of all the activities were produced by the Project Committee and working group in the planning stage.</li> </ul> |
|                              | Training, Certification and pre-survey                                                                                                                                                                                                                                                                                                                                                                                                                                                                                                                                                                                                                                                                                                                                                                                                                                                  |
| Data collection and analysis |                                                                                                                                                                                                                                                                                                                                                                                                                                                                                                                                                                                                                                                                                                                                                                                                                                                                                         |

monitoring team

Data analysis

- All data would be cleaned and encrypted before analysis
- An analytical protocol would be developed prior to data analysis and all results would be reported

Sample collection

Sample collection and transportation

- A standard procedure for sample collection, storage and transportation were developed by the Project Committee and working group
  - Samples were collected from each center and dispensed according to the protocol
  - Reagents and tubes were purchased uniformly to ensure consistency
- Sample transportation and storage
- Tissue, saliva sample and half of the blood samples, including two pipes of blood cell and two pipes would be transported on dry ice to the central biobank in Linxian
  - All samples would be stored at -80°C freezer for long-term preservation at each local site and central biobank
  - All samples were tracked by the management center

Periodic site visits

- Periodic site visits to each center to check whether the screening were carried out according to the protocol
- Periodic centralized communication to one center to exchange experience and answer questions

Supervision and assessment

Assessment

- There were a series of indicators to assess the investigators, including the quality of the questionnaire, the duration of the survey, and the completeness of the questionnaire, etc. For the investigators who fail in the assessment, a re-training and re-certification was required before they participated in the survey.
- An annual report with detail work description in the previous year was required for each center at the end of the year
- Performance was evaluated based on the annual report and assessment of periodic site visits
